# Supplementary material for: Compliant lower limb exoskeletons: a comprehensive review on mechanical design principles
Source: PubMed Central journal article supplement (PMC6506961; doi:10.1186/s12984-019-0517-9), 2019-05-09
Supplement: 12984_2019_517_MOESM1_ESM.pdf [file 12984_2019_517_MOESM1_ESM.pdf]

# **Data sheets**

**Compliant lower limb exoskeletons: A comprehensive review  
on mechanical design principles**

|                    |                                                                                   |
|--------------------|-----------------------------------------------------------------------------------|
| <b>Ankle_DP</b>    | Ankle Dorsi/Plantar-flexion                                                       |
| <b>Ankle_EE</b>    | Ankle Endo/Exo-rotation                                                           |
| <b>Ankle_P</b>     | Ankle Plantar-flexion                                                             |
| <b>Ankle_PS</b>    | Ankle Pronation/Supination                                                        |
| <b>ARES</b>        | Adjustable Rigidity and Embedded Sensor                                           |
| <b>CP</b>          | Cerebral Palsy                                                                    |
| <b>C-DSSAS</b>     | Compact Dual Spiral Spring Actuation System                                       |
| <b>CompAct-ARS</b> | CompAct Actuator with Reconfigurable Stiffness                                    |
| <b>cRSEA</b>       | compact Rotary Series Elastic Actuator                                            |
| <b>Hip_AA</b>      | Hip Ab/Adduction                                                                  |
| <b>Hip_E</b>       | Hip Extension                                                                     |
| <b>Hip_EE</b>      | Hip Endo/Exo-rotation                                                             |
| <b>Hip_F</b>       | Hip Flexion                                                                       |
| <b>Hip_FE</b>      | Hip Flexion/Extension                                                             |
| <b>Knee_FE</b>     | Knee Flexion/Extension                                                            |
| <b>MACCEPA</b>     | Mechanically Adjustable Compliance and Controllable Equilibrium Position Actuator |
| <b>MS</b>          | Multiple Sclerosis                                                                |
| <b>N/A</b>         | Not Available                                                                     |
| <b>PA</b>          | Power Augmentation                                                                |
| <b>PAM</b>         | Pneumatic Artificial Muscle                                                       |
| <b>PPAM</b>        | Pleated Pneumatic Artificial Muscle                                               |
| <b>RSEA</b>        | Rotary Series Elastic Actuator                                                    |
| <b>SCI</b>         | Spinal Cord Injury                                                                |
| <b>SMA</b>         | Spinal Muscular Atrophy                                                           |
| <b>SEA</b>         | Series Elastic Actuator                                                           |
| <b>VSA</b>         | Variable Stiffness Actuator                                                       |

### Actuators

|                                          |          |
|------------------------------------------|----------|
| Type                                     | SEA      |
| Location                                 | On-board |
| Power                                    | N/A      |
| Maximum torque                           | N/A      |
| Maximum speed                            | N/A      |
| Bandwidth                                | N/A      |
| Weight                                   | N/A      |
| Modular actuators                        | N/A      |
| <i>Actuator specific characteristics</i> |          |
| Spring typology                          | N/A      |
| Spring stiffness                         | N/A      |
| Actuator stiffness                       | N/A      |

### Structure & interface attachment components

|                                 |                                                                                                                                                  |
|---------------------------------|--------------------------------------------------------------------------------------------------------------------------------------------------|
| Allowable wearer maximum weight | N/A                                                                                                                                              |
| Allowable wearer height range   | N/A                                                                                                                                              |
| Anthropomorphic considerations  | A range of user spanning from the 5th to 95th percentile was considered.                                                                         |
| Configurable dimensions         | <ul style="list-style-type: none"> <li>· Pelvis width</li> <li>· Hip axis-knee axis distance</li> <li>· Knee axis-ankle axis distance</li> </ul> |
| Structure typology              | Rigid structure                                                                                                                                  |
| Braces/segment                  | 1                                                                                                                                                |

### Applicability & general characteristics

|                      |                                               |
|----------------------|-----------------------------------------------|
| Target user          | Adults                                        |
| Application          | Rehabilitation (SCI/stroke)/ PA               |
| Unilateral/bilateral | Bilateral                                     |
| Set up               | Ambulatory                                    |
| Exoskeleton weight   | 26 kg                                         |
| Total DoFs           | 5 (Hip_AA, Hip_EE, Hip_FE, Knee_FE, Ankle_DP) |
| Actuated DoFs        | 2 (Hip_FE, Knee_FE)                           |
| Walking speed        | N/A                                           |

### Control

|                    |                                                                                                                                                                |
|--------------------|----------------------------------------------------------------------------------------------------------------------------------------------------------------|
| Control strategies | <ul style="list-style-type: none"> <li>· Impedance control</li> <li>· Position control</li> <li>· Torque control</li> <li>· Zero assistance control</li> </ul> |
|--------------------|----------------------------------------------------------------------------------------------------------------------------------------------------------------|

### Electric power supply

|                  |     |
|------------------|-----|
| Battery autonomy | N/A |
|------------------|-----|

### Related publications

- [1] Rea R, Beck C, Rovekamp R. X1 : A Robotic Exoskeleton for In - Space Countermeasures. In: AIAA SPACE 2013 Conference and Exposition. San Diego (USA); 2013. p. 5510. doi:10.2514/6.2013-5510.
- [2] He Y, Nathan K, Venkatakrishnan A, Rovekamp R, Beck C, Francisco GE, et al. An Integrated Neuro-Robotic Interface for Stroke Rehabilitation using the NASA X1 Powered Lower Limb Exoskeleton. In: 36th Annual International Conference of the IEEE EMBS. Chicago (USA); 2014. p. 3985–8. doi:10.1109/EMBC.2014.6944497.

## Actuators

|                                          |                             |
|------------------------------------------|-----------------------------|
| Type                                     | RSEA                        |
| Location                                 | On-board                    |
| Power                                    | N/A                         |
| Maximum torque                           | 80 Nm                       |
| Maximum speed                            | 6.80 rad/s                  |
| Bandwidth                                | 15 Nm-10 Hz; <15 Nm-30 Hz   |
| Weight                                   | N/A                         |
| Modular actuators                        | ✓                           |
| <i>Actuator specific characteristics</i> |                             |
| Spring typology                          | Linear spring, Bowden cable |
| Spring stiffness                         | N/A                         |
| Actuator stiffness                       | N/A                         |

## Structure & interface attachment components

|                                 |                                      |
|---------------------------------|--------------------------------------|
| Allowable wearer maximum weight | N/A                                  |
| Allowable wearer height range   | N/A                                  |
| Anthropomorphic considerations  | N/A                                  |
| Configurable dimensions         | N/A                                  |
| Structure typology              | Rigid structure                      |
| Braces/segment                  | Combined solution (2 thigh, 1 shank) |

## Applicability & general characteristics

|                      |                                               |
|----------------------|-----------------------------------------------|
| Target user          | Adults                                        |
| Application          | Assistance                                    |
| Unilateral/bilateral | Bilateral                                     |
| Set up               | Ambulatory (crutches/walker)                  |
| Exoskeleton weight   | N/A                                           |
| Total DoFs           | 5 (Hip_AA, Hip_EE, Hip_FE, Knee_FE, Ankle_DP) |
| Actuated DoFs        | 3 (Hip_AA, Hip_FE, Knee_FE)                   |
| Walking speed        | N/A                                           |

## Control

|                    |                                                                                                                                        |
|--------------------|----------------------------------------------------------------------------------------------------------------------------------------|
| Control strategies | <ul style="list-style-type: none"> <li>· Torque/force control</li> <li>· Position control</li> <li>· Zero impedance control</li> </ul> |
|--------------------|----------------------------------------------------------------------------------------------------------------------------------------|

## Electric power supply

|                  |     |
|------------------|-----|
| Battery autonomy | N/A |
|------------------|-----|

## Related publications

[1] Missel M, Pra JE, Ne PD. Development of the IHMC Mobility Assist Exoskeleton. In: 2009 IEEE International Conference on Robotics and Automation (ICRA). Kobe (Japan); 2009. doi:10.1109/ROBOT.2009.5152394.

**Actuators**

|                                          |                                          |
|------------------------------------------|------------------------------------------|
| Type                                     | SEA                                      |
| Location                                 | On-board                                 |
| Power                                    | 1 kW (actuator)                          |
| Maximum torque                           | 100 Nm                                   |
| Maximum speed                            | N/A                                      |
| Bandwidth                                | 100 Nm-6.7 Hz; 2 Nm-38.2 Hz              |
| Weight                                   | 2.90 kg                                  |
| Modular actuators                        | ✓                                        |
| <i>Actuator specific characteristics</i> |                                          |
| Spring typology                          | Custom made disc-shaped torsional spring |
| Spring stiffness                         | 820 Nm/rad                               |
| Actuator stiffness                       | N/A                                      |

**Structure & interface attachment components**

|                                 |                                                                                                                                                  |
|---------------------------------|--------------------------------------------------------------------------------------------------------------------------------------------------|
| Allowable wearer maximum weight | 100 kg                                                                                                                                           |
| Allowable wearer height range   | 153-188 cm                                                                                                                                       |
| Anthropomorphic considerations  | Anatomical measures of 90% of the European adult population were considered (user height and hip width)                                          |
| Configurable dimensions         | <ul style="list-style-type: none"> <li>· Pelvis width</li> <li>· Hip axis-knee axis distance</li> <li>· Knee axis-ankle axis distance</li> </ul> |
| Structure typology              | Rigid structure                                                                                                                                  |
| Braces/segment                  | 1                                                                                                                                                |

**Applicability & general characteristics**

|                      |                                               |
|----------------------|-----------------------------------------------|
| Target user          | Adults                                        |
| Application          | Rehabilitation (SCI)                          |
| Unilateral/bilateral | Bilateral                                     |
| Set up               | Ambulatory (crutches)                         |
| Exoskeleton weight   | 28 kg                                         |
| Total DoFs           | 5 (Hip_AA, Hip_EE, Hip_FE, Knee_FE, Ankle_DP) |
| Actuated DoFs        | 3 (Hip_AA, Hip_FE, Knee_FE)                   |
| Walking speed        | 0.80 m/s                                      |

**Control**

|                    |                                                                                                          |
|--------------------|----------------------------------------------------------------------------------------------------------|
| Control strategies | <ul style="list-style-type: none"> <li>· Variable impedance control</li> <li>· Torque control</li> </ul> |
|--------------------|----------------------------------------------------------------------------------------------------------|

**Electric power supply**

|                  |     |
|------------------|-----|
| Battery autonomy | N/A |
|------------------|-----|

**Related publications**

- [1] Wang S, Wang L, Meijneke C, Asseldonk E Van, Hoellinger T, Cheron G, et al. Design and Control of the MINDWALKER Exoskeleton. *IEEE Trans Neural Syst Rehabil Eng.* 2015;23:277–86. doi:10.1109/TNSRE.2014.2365697.
- [2] Wang S, Meijneke C, van der Kooij H. Modeling, design, and optimization of Mindwalker series elastic joint. In: 2013 IEEE International Conference on Rehabilitation Robotics (ICORR). Seattle (USA); 2013. doi:10.1109/ICORR.2013.6650381.
- [3] Wang L, Wang S, Asseldonk EHF Van, Kooij H Van Der. Actively Controlled Lateral Gait Assistance in a Lower Limb Exoskeleton. In: 2013 IEEE/RSJ International Conference on Intelligent Robots and Systems (IROS). Tokyo (Japan); 2013.



**Actuators**

|                                          |          |
|------------------------------------------|----------|
| Type                                     | SEA      |
| Location                                 | On-board |
| Power                                    | N/A      |
| Maximum torque                           | 22 Nm    |
| Maximum speed                            | N/A      |
| Bandwidth                                | N/A      |
| Weight                                   | N/A      |
| Modular actuators                        | ✘        |
| <i>Actuator specific characteristics</i> |          |
| Spring typology                          | N/A      |
| Spring stiffness                         | N/A      |
| Actuator stiffness                       | N/A      |

**Structure & interface attachment components**

|                                 |                 |
|---------------------------------|-----------------|
| Allowable wearer maximum weight | 75 kg           |
| Allowable wearer height range   | N/A             |
| Anthropomorphic considerations  | N/A             |
| Configurable dimensions         | N/A             |
| Structure typology              | Rigid structure |
| Braces/segment                  | 1               |

**Applicability & general characteristics**

|                      |                                     |
|----------------------|-------------------------------------|
| Target user          | Adults                              |
| Application          | Rehabilitation                      |
| Unilateral/bilateral | Bilateral                           |
| Set up               | Safety harness                      |
| Exoskeleton weight   | 30                                  |
| Total DoFs           | 4 (Hip_AA, Hip_EE, Hip_FE, Knee_FE) |
| Actuated DoFs        | 2 (Hip_FE, Knee_FE)                 |
| Walking speed        | 1.3 m/s                             |

**Control**

|                    |                  |
|--------------------|------------------|
| Control strategies | Position control |
|--------------------|------------------|

**Electric power supply**

|                  |     |
|------------------|-----|
| Battery autonomy | N/A |
|------------------|-----|

**Related publications**

[1] Zhang C, Liu G, Li C, Zhao J, Yu H, Zhu Y. Development of a lower limb rehabilitation exoskeleton based on real-time gait detection and gait tracking. Adv Mech Eng. 2016;8:1–9. doi:10.1177/1687814015627982.

**Actuators**

|                                          |                  |
|------------------------------------------|------------------|
| Type                                     | MACCEPA (VSA)    |
| Location                                 | On-board         |
| Power                                    | 180 W (actuator) |
| Maximum torque                           | 40 Nm            |
| Maximum speed                            | 5.80 rad/s       |
| Bandwidth                                | 3 Hz             |
| Weight                                   | 2.40 kg          |
| Modular actuators                        | ✓                |
| <i>Actuator specific characteristics</i> |                  |
| Spring typology                          | Linear spring    |
| Spring stiffness                         | 28 N/mm          |
| Actuator stiffness                       | 110 Nm/rad       |

**Structure & interface attachment components**

|                                 |                                      |
|---------------------------------|--------------------------------------|
| Allowable wearer maximum weight | 75 kg                                |
| Allowable wearer height range   | N/A                                  |
| Anthropomorphic considerations  | N/A                                  |
| Configurable dimensions         | N/A                                  |
| Structure typology              | Rigid structure                      |
| Braces/segment                  | Combined solution (2 thigh, 1 shank) |

**Applicability & general characteristics**

|                      |                                     |
|----------------------|-------------------------------------|
| Target user          | Adults                              |
| Application          | Rehabilitation (SCI/stroke)         |
| Unilateral/bilateral | Bilateral                           |
| Set up               | Treadmill-based (support structure) |
| Exoskeleton weight   | N/A                                 |
| Total DoFs           | 3 (Hip_FE, Knee_FE, Ankle_DP)       |
| Actuated DoFs        | 3 (Hip_FE, Knee_FE, Ankle_DP)       |
| Walking speed        | N/A                                 |

**Control**

|                    |                                                                                                                                                                                     |
|--------------------|-------------------------------------------------------------------------------------------------------------------------------------------------------------------------------------|
| Control strategies | <ul style="list-style-type: none"> <li>· Force control</li> <li>· Position control</li> <li>· Torque control</li> <li>· Zero torque control</li> <li>· Impedance control</li> </ul> |
|--------------------|-------------------------------------------------------------------------------------------------------------------------------------------------------------------------------------|

**Electric power supply**

|                  |     |
|------------------|-----|
| Battery autonomy | N/A |
|------------------|-----|

**Related publications**

- [1] Brackx B, Grosu V, Ham RVAN, Damme MVAN, Vanderborght B, Lefeber D. Design of the gait rehabilitation robot ALTACRO: a powered exoskeleton using compliant actuation. In: 5th International Workshop on Human-Friendly Robotics. Brussels (Belgium); 2012.
- [2] Damme VAN, Vanderborght B. Electronic hardware architecture of step rehabilitation robot ALTACRO. In: 9th National Congress on Theoretical and Applied Mechanics. Brussels (Belgium); 2012. p. 9–10.
- [3] Grosu V, Rodriguez Gerrero C, Brackx B, Grosu S, Vanderborght B, Lefeber D. Instrumenting Complex Exoskeletons for Improved Human-Robot Interaction. IEEE Instrum Meas Mag. 2015;18:5–10. doi:10.1109/MIM.2015.7271219.



- [4] Junius K, Cherelle P, Brackx B, Geeroms J, Schepers T, Vanderborght B, et al. On the use of adaptable compliant actuators in prosthetics, rehabilitation and assistive robotics. In: 9th International Workshop on Robot Motion and Control. Wasowo (Poland); 2013.
- [5] Cherelle P, Grosu V, Beyl P, Mathys A, Ham R Van, Damme M Van, et al. The MACCEPA Actuation System as Torque Actuator in the Gait Rehabilitation Robot ALTACRO. In: 3rd IEEE RAS & EMBS International Conference on Biomedical Robotics and Biomechanics (BioRob). Tokyo (Japan); 2010. p. 27–32. doi:10.1109/BIOROB.2010.5627030.
- [6] Grosu V, Rodriguez-Guerrero C, Grosu S, Vanderborght B, Lefeber D. Design of Smart Modular Variable Stiffness Actuators for Robotic-Assistive Devices. *IEEE/ASME Trans Mechatronics*. 2017;22:1777–85. doi:10.1109/TMECH.2017.2704665.
-

### Actuators

|                                          |               |
|------------------------------------------|---------------|
| Type                                     | ARES (VSA)    |
| Location                                 | On-board      |
| Power                                    | 90 W (motor)  |
| Maximum torque                           | 76 Nm         |
| Maximum speed                            | 2.50 rad/s    |
| Bandwidth                                | N/A           |
| Weight                                   | 0.90 kg       |
| Modular actuators                        | ✘             |
| <i>Actuator specific characteristics</i> |               |
| Spring typology                          | Linear spring |
| Spring stiffness                         | N/A           |
| Actuator stiffness                       | 260.50 Nm/rad |

### Structure & interface attachment components

|                                 |                                                                  |
|---------------------------------|------------------------------------------------------------------|
| Allowable wearer maximum weight | 35 kg                                                            |
| Allowable wearer height range   | 100-135 cm                                                       |
| Anthropomorphic considerations  | N/A                                                              |
| Configurable dimensions         | · Hip axis-knee axis distance<br>· Knee axis-ankle axis distance |
| Structure typology              | Rigid structure                                                  |
| Braces/segment                  | 1                                                                |

### Applicability & general characteristics

|                      |                                       |
|----------------------|---------------------------------------|
| Target user          | Children                              |
| Application          | Assistance/rehabilitation (SCI, SMA)  |
| Unilateral/bilateral | Bilateral                             |
| Set up               | Special standing frame (walker frame) |
| Exoskeleton weight   | 14 kg                                 |
| Total DoFs           | 4 (Hip_AA, Hip_FE, Knee_FE, Ankle_DP) |
| Actuated DoFs        | 4 (Hip_AA, Hip_FE, Knee_FE, Ankle_DP) |
| Walking speed        | 0.50 m/s                              |

### Control

|                    |     |
|--------------------|-----|
| Control strategies | N/A |
|--------------------|-----|

### Electric power supply

|                  |           |
|------------------|-----------|
| Battery autonomy | 2.5 hours |
|------------------|-----------|

### Related publications

- [1] Sanz-Merodio D, Cestari M, Arevalo JC, Garcia E. A lower-limb exoskeleton for gait assistance in quadriplegia. In: 2012 IEEE International Conference on Robotics and Biomimetics. Guangzhou (China); 2012. p. 122–7. doi:10.1109/ROBIO.2012.6490954.
- [2] Cestari M, Sanz-Merodio D, Arevalo JC, Garcia E. An Adjustable Compliant Joint for Lower-Limb Exoskeletons. IEEE/ASME Trans Mechatronics. 2015;20:889–98. doi:10.1109/TMECH.2014.2324036.
- [3] Cestari M, Sanz-Merodio D, Arevalo JC, Garcia E. ARES, a variable stiffness actuator with embedded force sensor for the ATLAS exoskeleton. Ind Rob. 2014;41:518–26. doi:10.1108/IR-06-2014-0350.
- [4] Ganguly A, Puyuelo G, Goñi A, Garcés E, Garcia E. Wearable pediatric gait exoskeleton- a feasibility study\*. In: 2018 IEEE/RSJ International Conference on Intelligent Robots and Systems (IROS). Madrid (Spain); 2018. p. 4667–72.

## Actuators

|                                          |                                                                              |
|------------------------------------------|------------------------------------------------------------------------------|
| Type                                     | ARES (SEA)*, ARES-XL (VSA)**<br>(* = hip actuator, ** = knee/ankle actuator) |
| Location                                 | On-board                                                                     |
| Power                                    | 90 W* (motor), N/A**                                                         |
| Maximum torque                           | 76 Nm*, N/A**                                                                |
| Maximum speed                            | 2.50 rad/s*, N/A**                                                           |
| Bandwidth                                | N/A                                                                          |
| Weight                                   | 0.90 kg*, N/A**                                                              |
| Modular actuators                        | ✘                                                                            |
| <i>Actuator specific characteristics</i> |                                                                              |
| Spring typology                          | Linear spring                                                                |
| Spring stiffness                         | 16.80 N/mm**                                                                 |
| Actuator stiffness                       | 260.50 Nm/rad*                                                               |

## Structure & interface attachment components

|                                 |                 |
|---------------------------------|-----------------|
| Allowable wearer maximum weight | N/A             |
| Allowable wearer height range   | N/A             |
| Anthropomorphic considerations  | N/A             |
| Configurable dimensions         | N/A             |
| Structure typology              | Rigid structure |
| Braces/segment                  | N/A             |

## Applicability & general characteristics

|                      |                                       |
|----------------------|---------------------------------------|
| Target user          | Children                              |
| Application          | Assistance                            |
| Unilateral/bilateral | Bilateral                             |
| Set up               | Special standing frame (walker frame) |
| Exoskeleton weight   | N/A                                   |
| Total DoFs           | 3 (Hip_FE, Knee_FE, Ankle_DP)         |
| Actuated DoFs        | 3 (Hip_FE, Knee_FE, Ankle_DP)         |
| Walking speed        | N/A                                   |

## Control

|                    |     |
|--------------------|-----|
| Control strategies | N/A |
|--------------------|-----|

## Electric power supply

|                  |     |
|------------------|-----|
| Battery autonomy | N/A |
|------------------|-----|

## Related publications

[1] Cestari M, Sanz-Merodio D, Garcia E. Preliminary Assessment of a Compliant Gait Exoskeleton. Soft Robot. 2017. doi:10.1089/soro.2016.0070.

**Actuators**

|                                          |                                                                  |
|------------------------------------------|------------------------------------------------------------------|
| Type                                     | SEA*, VSA**<br>(* = hip and knee actuators, ** = ankle actuator) |
| Location                                 | On-board                                                         |
| Power                                    | N/A                                                              |
| Maximum torque                           | N/A                                                              |
| Maximum speed                            | N/A                                                              |
| Bandwidth                                | N/A                                                              |
| Weight                                   | N/A                                                              |
| Modular actuators                        | ✘                                                                |
| <i>Actuator specific characteristics</i> |                                                                  |
| Spring typology                          | Linear spring**                                                  |
| Spring stiffness                         | N/A                                                              |
| Actuator stiffness                       | N/A                                                              |

**Structure & interface attachment components**

|                                 |                                                                                   |
|---------------------------------|-----------------------------------------------------------------------------------|
| Allowable wearer maximum weight | N/A                                                                               |
| Allowable wearer height range   | N/A                                                                               |
| Anthropomorphic considerations  | N/A                                                                               |
| Configurable dimensions         | · Hip axis-knee axis distance<br>· Knee axis-ankle axis distance<br>· Foot length |
| Structure typology              | Rigid structure                                                                   |
| Braces/segment                  | 1                                                                                 |

**Applicability & general characteristics**

|                      |                               |
|----------------------|-------------------------------|
| Target user          | Adults                        |
| Application          | Assistance (PA)               |
| Unilateral/bilateral | Bilateral                     |
| Set up               | Ambulatory                    |
| Exoskeleton weight   | N/A                           |
| Total DoFs           | 3 (Hip_FE, Knee_FE, Ankle_DP) |
| Actuated DoFs        | 3 (Hip_FE, Knee_FE, Ankle_DP) |
| Walking speed        | N/A                           |

**Control**

|                    |     |
|--------------------|-----|
| Control strategies | N/A |
|--------------------|-----|

**Electric power supply**

|                  |     |
|------------------|-----|
| Battery autonomy | N/A |
|------------------|-----|

**Related publications**

[1] Baser O, Kizilhan H, Kilic E. Mechanical Design of a Biomimetic Compliant Lower Limb Exoskeleton (BioComEx). In: 2016 International Conference on Autonomous Robot Systems and Competitions (ICARSC). Braganca (Portugal); 2016. p. 60–5. doi:10.1109/ICARSC.2016.51.

## Actuators

|                                          |                                                       |
|------------------------------------------|-------------------------------------------------------|
| Type                                     | MACCEPA (VSA)<br>(*=knee actuator, **=ankle actuator) |
| Location                                 | On-board                                              |
| Power                                    | N/A                                                   |
| Maximum torque                           | 50 Nm                                                 |
| Maximum speed                            | N/A                                                   |
| Bandwidth                                | N/A                                                   |
| Weight                                   | 1.18 kg**                                             |
| Modular actuators                        | ✘                                                     |
| <i>Actuator specific characteristics</i> |                                                       |
| Spring typology                          | Linear spring                                         |
| Spring stiffness                         | 70 N/mm*                                              |
| Actuator stiffness                       | N/A                                                   |

## Structure & interface attachment components

|                                 |                                                                                                                                                  |
|---------------------------------|--------------------------------------------------------------------------------------------------------------------------------------------------|
| Allowable wearer maximum weight | 80 kg                                                                                                                                            |
| Allowable wearer height range   | N/A                                                                                                                                              |
| Anthropomorphic considerations  | Total leg segment adjustability in between 0.35 and 0.45 m.                                                                                      |
| Configurable dimensions         | <ul style="list-style-type: none"> <li>· Pelvis width</li> <li>· Hip axis-knee axis distance</li> <li>· Knee axis-ankle axis distance</li> </ul> |
| Structure typology              | Rigid structure                                                                                                                                  |
| Braces/segment                  | 2                                                                                                                                                |

## Applicability & general characteristics

|                      |                               |
|----------------------|-------------------------------|
| Target user          | Adults                        |
| Application          | Rehabilitation (SCI)          |
| Unilateral/bilateral | Bilateral                     |
| Set up               | Ambulatory                    |
| Exoskeleton weight   | 19.40 kg                      |
| Total DoFs           | 3 (Hip_FE, Knee_FE, Ankle_DP) |
| Actuated DoFs        | 3 (Hip_FE, Knee_FE, Ankle_DP) |
| Walking speed        | N/A                           |

## Control

|                    |                |
|--------------------|----------------|
| Control strategies | Torque control |
|--------------------|----------------|

## Electric power supply

|                  |     |
|------------------|-----|
| Battery autonomy | N/A |
|------------------|-----|

## Related publications

- [1] Bacek T, Moltedo M, Langlois K, Prieto GA, Sanchez-Villamanan MC, Gonzalez-Vargas J, et al. BioMot exoskeleton — Towards a smart wearable robot for symbiotic human-robot interaction. In: 2017 International Conference on Rehabilitation Robotics (ICORR). London (UK); 2017. p. 1666–71. doi:10.1109/ICORR.2017.8009487.
- [2] Bacek T, Unal R, Moltedo M, Junius K, Cuypers H, Vanderborgh B, et al. Conceptual Design of a Novel Variable Stiffness Actuator for Use in Lower Limb Exoskeletons. In: 2015 IEEE International Conference on Rehabilitation Robotics (ICORR). Singapore (Singapore); 2015. doi:10.1109/ICORR.2015.7281263.
- [3] Moltedo M, Bacek T, Junius K, Vanderborgh B, Lefeber D. Mechanical Design of a Lightweight Compliant and Adaptable

Active Ankle Foot Orthosis. In: 6th IEEE RAS/EMBS International Conference on Biomedical Robotics and Biomechatronics (BioRob). Singapore (Singapore); 2016. p. 1224–9. doi:10.1109/BIOROB.2016.7523798.

[4] Bacek T, Moltedo M, Gonzalez-Vargas J, Asin Prieto G, Sanchez-Villamañan MC, Moreno JC, et al. The new generation of compliant actuators for use in controllable bio-inspired wearable robots. In: Wearable robotics: challenges and trends; proceedings of the 2nd International Symposium on Wearable Robotics (WeRob2016). La Granja (Segovia), Spain; 2016. p. 255–60.

[5] Moltedo M, Bacek T, Langlois K, Junius K, Vanderborgh B, Lefeber D. Design and experimental evaluation of a lightweight, high-torque and compliant actuator for an active ankle foot orthosis. In: 2017 International Conference on Rehabilitation Robotics (ICORR). London (UK); 2017. p. 283–8. doi:10.1109/ICORR.2017.8009260.

---

## Actuators

|                                          |                    |
|------------------------------------------|--------------------|
| Type                                     | MACCEPA (VSA)      |
| Location                                 | On-board           |
| Power                                    | N/A                |
| Maximum torque                           | 15 Nm              |
| Maximum speed                            | N/A                |
| Bandwidth                                | N/A                |
| Weight                                   | 1.40 kg            |
| Modular actuators                        | ✓                  |
| <i>Actuator specific characteristics</i> |                    |
| Spring typology                          | Linear spring      |
| Spring stiffness                         | 15 N/mm            |
| Actuator stiffness                       | 28.07-81.36 Nm/rad |

## Structure & interface attachment components

|                                 |                 |
|---------------------------------|-----------------|
| Allowable wearer maximum weight | 80 kg           |
| Allowable wearer height range   | 165-190 cm      |
| Anthropomorphic considerations  | N/A             |
| Configurable dimensions         | N/A             |
| Structure typology              | Rigid structure |
| Braces/segment                  | 1               |

## Applicability & general characteristics

|                      |                                   |
|----------------------|-----------------------------------|
| Target user          | Adults                            |
| Application          | Assistance (Elderly/MS/stroke/CP) |
| Unilateral/bilateral | Bilateral                         |
| Set up               | Ambulatory                        |
| Exoskeleton weight   | 13 kg                             |
| Total DoFs           | 3 (Hip_FE, Knee_FE, Ankle_DP)     |
| Actuated DoFs        | 3 (Hip_FE, Knee_FE, Ankle_DP)     |
| Walking speed        | N/A                               |

## Control

|                    |                                                                                                              |
|--------------------|--------------------------------------------------------------------------------------------------------------|
| Control strategies | <ul style="list-style-type: none"> <li>· Assistance-as-needed control</li> <li>· Position control</li> </ul> |
|--------------------|--------------------------------------------------------------------------------------------------------------|

## Electric power supply

|                  |     |
|------------------|-----|
| Battery autonomy | N/A |
|------------------|-----|

## Related publications

- [1] Junius K, Brackx B, Grosu V, Cuypers H, Geeroms J, Moltedo M, et al. Mechatronic Design of a Sit-to-Stance Exoskeleton. In: 5th IEEE RAS & EMBS International Conference on Biomedical Robotics and Biomechatronics (BioRob). Sao Paulo (Brazil); 2014. p. 945–50. doi:10.1109/BIOROB.2014.6913902.
- [2] Brackx B, Geeroms J, Vantilt J, Grosu V, Junius K, Cuypers H, et al. Design of a Modular Add-on Compliant Actuator to Convert an Orthosis into an Assistive Exoskeleton. In: 5th IEEE RAS & EMBS International Conference on Biomedical Robotics and Biomechatronics (BioRob). Sao Paulo (Brazil); 2014. doi:10.1109/BIOROB.2014.6913824.

### Actuators

|                                          |                                                                                            |
|------------------------------------------|--------------------------------------------------------------------------------------------|
| Type                                     | SEA<br>(* = Hip/knee flexion-extension actuator,<br>** = Hip abduction-adduction actuator) |
| Location                                 | On-board                                                                                   |
| Power                                    | N/A                                                                                        |
| Maximum torque                           | 100 Nm                                                                                     |
| Maximum speed                            | N/A                                                                                        |
| Bandwidth                                | 11 Hz; 20 Hz                                                                               |
| Weight                                   | N/A                                                                                        |
| Modular actuators                        | ✓                                                                                          |
| <i>Actuator specific characteristics</i> |                                                                                            |
| Spring typology                          | Bowden cable, linear spring                                                                |
| Spring stiffness                         | 35.10 N/mm*, 57.20 N/mm**                                                                  |
| Actuator stiffness                       | N/A                                                                                        |

### Structure & interface attachment components

|                                 |                                                 |
|---------------------------------|-------------------------------------------------|
| Allowable wearer maximum weight | 90 kg                                           |
| Allowable wearer height range   | N/A                                             |
| Anthropomorphic considerations  | N/A                                             |
| Configurable dimensions         | · Pelvis width<br>· Hip axis-knee axis distance |
| Structure typology              | Rigid structure                                 |
| Braces/segment                  | 1                                               |

### Applicability & general characteristics

|                      |                             |
|----------------------|-----------------------------|
| Target user          | Adult                       |
| Application          | Rehabilitation (Stroke)     |
| Unilateral/bilateral | Bilateral                   |
| Set up               | Treadmill-based             |
| Exoskeleton weight   | N/A                         |
| Total DoFs           | 3 (Hip_AA, Hip_FE, Knee_FE) |
| Actuated DoFs        | 3 (Hip_AA, Hip_FE, Knee_FE) |
| Walking speed        | 0.75 m/s                    |

### Control

|                    |                                                                             |
|--------------------|-----------------------------------------------------------------------------|
| Control strategies | · Impedance control<br>· Position control<br>· Zero force/impedance control |
|--------------------|-----------------------------------------------------------------------------|

### Electric power supply

|                  |     |
|------------------|-----|
| Battery autonomy | N/A |
|------------------|-----|

### Related publications

- [1] Veneman JF, Ekkelenkamp R, Kruidhof R, van der Helm FCT, van der Kooij H. Design of a Series Elastic and Bowdencable-Based Actuation System for Use As Torque-Actuator in Exoskeleton-Type Training Robots. In: 9th IEEE International Conference on Rehabilitation Robotics (ICORR). 2005. p. 496–9. doi:10.1109/ICORR.2005.1501150.
- [2] Ekkelenkamp R, Veneman J, Kooij H Van Der. LOPES: a lower extremity powered exoskeleton. In: 2007 IEEE International Conference on Robotics and Automation (ICRA). Roma (Italy); 2007. p. 3132–3.
- [3] Veneman JF, Kruidhof R, Hekman EEG, Ekkelenkamp R, Asseldonk EHF Van. Design and Evaluation of the LOPES Exoskeleton



Robot for Interactive Gait Rehabilitation. IEEE Trans Neural Syst Rehabil Eng. 2007;15:379–86. doi:10.1109/TNSRE.2007.903919.

[4] Kooij H Van Der, Veneman J, Ekkelenkamp R. Design of a compliantly actuated exo-skeleton for an impedance controlled gait trainer robot. In: 28th IEEE EMBS Annual International Conference. New York City (USA); 2006. p. 189–93. doi:10.1109/IEMBS.2006.259397.

[5] Veneman JF. Design and Evaluation of the Gait Rehabilitation Robot Lopes. University of Twente; 2007.

---

**Actuators**

|                                          |                  |
|------------------------------------------|------------------|
| Type                                     | SEA              |
| Location                                 | On-board         |
| Power                                    | N/A              |
| Maximum torque                           | N/A              |
| Maximum speed                            | N/A              |
| Bandwidth                                | N/A              |
| Weight                                   | N/A              |
| Modular actuators                        | ✓                |
| <i>Actuator specific characteristics</i> |                  |
| Spring typology                          | Torsional spring |
| Spring stiffness                         | N/A              |
| Actuator stiffness                       | N/A              |

**Structure & interface attachment components**

|                                 |                                      |
|---------------------------------|--------------------------------------|
| Allowable wearer maximum weight | N/A                                  |
| Allowable wearer height range   | N/A                                  |
| Anthropomorphic considerations  | Adult body measures were considered  |
| Configurable dimensions         | N/A                                  |
| Structure typology              | Rigid structure                      |
| Braces/segment                  | Combined solution (2 thigh, 1 shank) |

**Applicability & general characteristics**

|                      |                               |
|----------------------|-------------------------------|
| Target user          | Adult                         |
| Application          | Assistance                    |
| Unilateral/bilateral | Bilateral                     |
| Set up               | Ambulatory                    |
| Exoskeleton weight   | N/A                           |
| Total DoFs           | 3 (Hip_FE, Knee_FE, Ankle_DP) |
| Actuated DoFs        | 2 (Hip_FE, Knee_FE)           |
| Walking speed        | N/A                           |

**Control**

|                    |               |
|--------------------|---------------|
| Control strategies | Force control |
|--------------------|---------------|

**Electric power supply**

|                  |     |
|------------------|-----|
| Battery autonomy | N/A |
|------------------|-----|

**Related publications**

[1] Kim S, Bae J. Development of a Lower Extremity Exoskeleton System for Human-Robot Interaction. In: 11th International Conference on Ubiquitous Robots and Ambient Intelligence (URAI). Kuala Lumpur (Malaysia); 2014. p. 132–5.

## Actuators

|                                          |                        |
|------------------------------------------|------------------------|
| Type                                     | VSA*<br>(*=knee joint) |
| Location                                 | On-board               |
| Power                                    | N/A                    |
| Maximum torque                           | 89.60 Nm*              |
| Maximum speed                            | 2.04 rad/s*            |
| Bandwidth                                | N/A                    |
| Weight                                   | N/A                    |
| Modular actuators                        | ✘                      |
| <i>Actuator specific characteristics</i> |                        |
| Spring typology                          | Linear spring*         |
| Spring stiffness                         | 109 N/mm               |
| Actuator stiffness                       | 380 Nm/rad             |

## Structure & interface attachment components

|                                 |                                                                                                                               |
|---------------------------------|-------------------------------------------------------------------------------------------------------------------------------|
| Allowable wearer maximum weight | 85 kg                                                                                                                         |
| Allowable wearer height range   | 175 – 190 cm                                                                                                                  |
| Anthropomorphic considerations  | N/A                                                                                                                           |
| Configurable dimensions         | Pelvis width: 34.5 - 40.0 cm.<br>Hip axis-knee axis distance: 43.5 - 49.5 cm<br>Knee axis-ankle axis distance: 38.0 - 44.0 cm |
| Structure typology              | Rigid structure                                                                                                               |
| Braces/segment                  | 1                                                                                                                             |

## Applicability & general characteristics

|                      |                               |
|----------------------|-------------------------------|
| Target user          | Adults                        |
| Application          | Assistance, Rehabilitation    |
| Unilateral/bilateral | Bilateral                     |
| Set up               | Ambulatory (crutches)         |
| Exoskeleton weight   | 35 kg                         |
| Total DoFs           | 3 (Hip_FE, Knee_FE, Ankle_DP) |
| Actuated DoFs        | 2 (Hip_FE, Knee_FE)           |
| Walking speed        | N/A                           |

## Control

|                    |                                                                                                   |
|--------------------|---------------------------------------------------------------------------------------------------|
| Control strategies | <ul style="list-style-type: none"> <li>· Position control</li> <li>· Stiffness control</li> </ul> |
|--------------------|---------------------------------------------------------------------------------------------------|

## Electric power supply

|                  |         |
|------------------|---------|
| Battery autonomy | 2 hours |
|------------------|---------|

## Related publications

[1] Schrade SO, Dätwyler K, Stücheli M, Studer K, Türk D-A, Meboldt M, et al. Development of VariLeg, an exoskeleton with variable stiffness actuation: first results and user evaluation from the CYBATHLON 2016. J Neuroeng Rehabil. 2018;15:18. doi:10.1186/s12984-018-0360-4.

**Actuators**

|                                          |                                          |
|------------------------------------------|------------------------------------------|
| Type                                     | SEA                                      |
| Location                                 | On-board                                 |
| Power                                    | N/A                                      |
| Maximum torque                           | 35 Nm                                    |
| Maximum speed                            | N/A                                      |
| Bandwidth                                | 15 Hz                                    |
| Weight                                   | 1.20 kg                                  |
| Modular actuators                        | -                                        |
| <i>Actuator specific characteristics</i> |                                          |
| Spring typology                          | Custom made disc-shaped torsional spring |
| Spring stiffness                         | N/A                                      |
| Actuator stiffness                       | 100 Nm/rad                               |

**Structure & interface attachment components**

|                                 |                                                       |
|---------------------------------|-------------------------------------------------------|
| Allowable wearer maximum weight | 80 kg                                                 |
| Allowable wearer height range   | N/A                                                   |
| Anthropomorphic considerations  | N/A                                                   |
| Configurable dimensions         | · Pelvis width<br>· Vertical position of the hip cuff |
| Structure typology              | Rigid structure                                       |
| Braces/segment                  | 1                                                     |

**Applicability & general characteristics**

|                      |                      |
|----------------------|----------------------|
| Target user          | Adults               |
| Application          | Assistance (Elderly) |
| Unilateral/bilateral | Bilateral            |
| Set up               | Ambulatory           |
| Exoskeleton weight   | 4.20 kg              |
| Total DoFs           | 2 (Hip_AA, Hip_FE)   |
| Actuated DoFs        | 1 (Hip_FE)           |
| Walking speed        | N/A                  |

**Control**

|                    |                                         |
|--------------------|-----------------------------------------|
| Control strategies | · Assistive control<br>· Torque control |
|--------------------|-----------------------------------------|

**Electric power supply**

|                  |     |
|------------------|-----|
| Battery autonomy | N/A |
|------------------|-----|

**Related publications**

[1] Giovacchini F, Vannetti F, Fantozzi M, Cortese M, Parri A, Yan T, et al. A light-weight active orthosis for hip movement assistance. *Rob Auton Syst.* 2014;73:123–34. doi:10.1016/j.robot.2014.08.015.

## Actuators

|                                          |                                          |
|------------------------------------------|------------------------------------------|
| Type                                     | SEA                                      |
| Location                                 | On-board                                 |
| Power                                    | 230 W (actuator)                         |
| Maximum torque                           | 60 Nm                                    |
| Maximum speed                            | N/A                                      |
| Bandwidth                                | N/A                                      |
| Weight                                   | 2.45 kg                                  |
| Modular actuators                        | ✓                                        |
| <i>Actuator specific characteristics</i> |                                          |
| Spring typology                          | Custom made disc-shaped torsional spring |
| Spring stiffness                         | 250 Nm/rad                               |
| Actuator stiffness                       | N/A                                      |

## Structure & interface attachment components

|                                 |                                                                             |
|---------------------------------|-----------------------------------------------------------------------------|
| Allowable wearer maximum weight | 80 kg                                                                       |
| Allowable wearer height range   | N/A                                                                         |
| Anthropomorphic considerations  | A range of the user spanning from the 5th to 95th percentile was considered |
| Configurable dimensions         | Segment between the thigh brace and the shank brace                         |
| Structure typology              | Rigid structure                                                             |
| Braces/segment                  | 1                                                                           |

## Applicability & general characteristics

|                      |                                     |
|----------------------|-------------------------------------|
| Target user          | Adults                              |
| Application          | Rehabilitation/assistance           |
| Unilateral/bilateral | Bilateral                           |
| Set up               | Treadmill-based (support structure) |
| Exoskeleton weight   | 25 kg                               |
| Total DoFs           | 2 (Hip_FE, Knee_FE)                 |
| Actuated DoFs        | 2 (Hip_FE, Knee_FE)                 |
| Walking speed        | N/A                                 |

## Control

|                    |                                         |
|--------------------|-----------------------------------------|
| Control strategies | · Stiffness control<br>· Torque control |
|--------------------|-----------------------------------------|

## Electric power supply

|                  |     |
|------------------|-----|
| Battery autonomy | N/A |
|------------------|-----|

## Related publications

- [1] Accoto D, Carpino G, Sergi F, Luigi N, Zollo L, Guglielmelli E. Design and Characterization of a Novel High-Power Series Elastic Actuator for a Lower Limb Robotic Orthosis. *Int J Adv Robot Syst.* 2013;10. doi:10.5772/56927.
- [2] Sergi F, Accoto D, Tagliamonte NL, Carpino G, Guglielmelli E. A systematic graph-based method for the kinematic synthesis of non-anthropomorphic wearable robots for the lower limbs. *Front Mech Eng.* 2011;6:61–70. doi:10.1007/s11465-011-0206-2.
- [3] Tagliamonte NL, Sergi F, Carpino G, Accoto D, Guglielmelli E. Human-Robot Interaction Tests on a Novel Robot for Gait Assistance. In: 2013 IEEE International Conference on Rehabilitation Robotics (ICORR). 2013. p. 1–6. doi:10.1109/ICORR.2013.6650387.
- [4] Sergi F, Accoto D, Tagliamonte NL, Carpino G, Galzerano S, Guglielmelli E. Kinematic synthesis, optimization and analysis of a non-anthropomorphic 2-DOFs wearable orthosis for gait assistance. In: 2012 IEEE/RSJ International Conference on Intelligent Robots and Systems (IROS). Vilamoura (Portugal); 2012. doi:10.1109/IROS.2012.6386260.

### Actuators

|                                          |                                           |
|------------------------------------------|-------------------------------------------|
| Type                                     | SEA                                       |
| Location                                 | On-board                                  |
| Power                                    | N/A                                       |
| Maximum torque                           | 60 Nm                                     |
| Maximum speed                            | N/A                                       |
| Bandwidth                                | N/A                                       |
| Weight                                   | N/A                                       |
| Modular actuators                        | ✓                                         |
| <i>Actuator specific characteristics</i> |                                           |
| Spring typology                          | Inherent compliance of the Harmonic Drive |
| Spring stiffness                         | -                                         |
| Actuator stiffness                       | 24 kNm/rad                                |

### Structure & interface attachment components

|                                 |                                                                  |
|---------------------------------|------------------------------------------------------------------|
| Allowable wearer maximum weight | N/A                                                              |
| Allowable wearer height range   | N/A                                                              |
| Anthropomorphic considerations  | N/A                                                              |
| Configurable dimensions         | · Hip axis-knee axis distance<br>· Knee axis-ankle axis distance |
| Structure typology              | Rigid structure                                                  |
| Braces/segment                  | 1                                                                |

### Applicability & general characteristics

|                      |                       |
|----------------------|-----------------------|
| Target user          | Adults                |
| Application          | Assistance (SCI)      |
| Unilateral/bilateral | Bilateral             |
| Set up               | Ambulatory (crutches) |
| Exoskeleton weight   | N/A                   |
| Total DoFs           | 2 (Hip_FE, Knee_FE)   |
| Actuated DoFs        | 2 (Hip_FE, Knee_FE)   |
| Walking speed        | 0.20 m/s              |

### Control

|                    |                                                               |
|--------------------|---------------------------------------------------------------|
| Control strategies | · Compliant control<br>· Position control<br>· Torque control |
|--------------------|---------------------------------------------------------------|

### Electric power supply

|                  |     |
|------------------|-----|
| Battery autonomy | N/A |
|------------------|-----|

### Related publications

- [1] Neuhaus PD, Noorden JH, Craig TJ, Torres T, Kirschbaum J, Pratt JE. Design and Evaluation of Mina a Robotic Orthosis for Paraplegics. In: 2011 IEEE International Conference on Rehabilitation Robotics (ICORR). Zurich (Switzerland); 2011. doi:10.1109/ICORR.2011.5975468.
- [2] Raj AK, Neuhaus PD, Moucheboeuf AM, Noorden JH, Lecoutre D V. Mina: A Sensorimotor Robotic Orthosis for Mobility Assistance. J Robot. 2011;2011. doi:10.1155/2011/284352.

**Actuators**

|                                          |                  |
|------------------------------------------|------------------|
| Type                                     | SEA              |
| Location                                 | On-board         |
| Power                                    | N/A              |
| Maximum torque                           | N/A              |
| Maximum speed                            | N/A              |
| Bandwidth                                | N/A              |
| Weight                                   | 1 kg             |
| Modular actuators                        | -                |
| <i>Actuator specific characteristics</i> |                  |
| Spring typology                          | Torsional spring |
| Spring stiffness                         | N/A              |
| Actuator stiffness                       | N/A              |

**Structure & interface attachment components**

|                                 |                 |
|---------------------------------|-----------------|
| Allowable wearer maximum weight | N/A             |
| Allowable wearer height range   | N/A             |
| Anthropomorphic considerations  | N/A             |
| Configurable dimensions         | N/A             |
| Structure typology              | Rigid structure |
| Braces/segment                  | 1               |

**Applicability & general characteristics**

|                      |                      |
|----------------------|----------------------|
| Target user          | Adults               |
| Application          | Assistance (Elderly) |
| Unilateral/bilateral | Bilateral            |
| Set up               | Ambulatory           |
| Exoskeleton weight   | 8 kg                 |
| Total DoFs           | 1 (Hip_FE)           |
| Actuated DoFs        | 1 (Hip_FE)           |
| Walking speed        | N/A                  |

**Control**

|                    |                |
|--------------------|----------------|
| Control strategies | Torque control |
|--------------------|----------------|

**Electric power supply**

|                  |     |
|------------------|-----|
| Battery autonomy | N/A |
|------------------|-----|

**Related publications**

[1] Parri A, Yan T, Giovacchini F, Cortese M, Muscolo M, Fantozzi M, et al. A portable active pelvis orthosis for ambulatory movement assistance. In: *Wearable robotics: challenges and trends; proceedings of the 2nd International Symposium on Wearable Robotics (WeRob2016)*. La Granja (Segovia), Spain; 2016. p. 75–80.

### Actuators

|                                          |                   |
|------------------------------------------|-------------------|
| Type                                     | CompAct-ARS (VSA) |
| Location                                 | On-board          |
| Power                                    | N/A               |
| Maximum torque                           | 80 Nm             |
| Maximum speed                            | N/A               |
| Bandwidth                                | N/A               |
| Weight                                   | N/A               |
| Modular actuators                        | -                 |
| <i>Actuator specific characteristics</i> |                   |
| Spring typology                          | Linear spring     |
| Spring stiffness                         | 55 N/mm           |
| Actuator stiffness                       | N/A               |

### Structure & interface attachment components

|                                 |                 |
|---------------------------------|-----------------|
| Allowable wearer maximum weight | 82.50 kg        |
| Allowable wearer height range   | N/A             |
| Anthropomorphic considerations  | N/A             |
| Configurable dimensions         | N/A             |
| Structure typology              | Rigid structure |
| Braces/segment                  | N/A             |

### Applicability & general characteristics

|                      |             |
|----------------------|-------------|
| Target user          | Adults      |
| Application          | Assistance  |
| Unilateral/bilateral | Bilateral   |
| Set up               | Ambulatory  |
| Exoskeleton weight   | N/A         |
| Total DoFs           | 1 (Knee_FE) |
| Actuated DoFs        | 1 (Knee_FE) |
| Walking speed        | N/A         |

### Control

|                    |                   |
|--------------------|-------------------|
| Control strategies | Assistive control |
|--------------------|-------------------|

### Electric power supply

|                  |     |
|------------------|-----|
| Battery autonomy | N/A |
|------------------|-----|

### Related publications

- [1] Karavas NC, Tsagarakis NG, Saglia J, Galdwell DG. A Novel Actuator with Reconfigurable Stiffness for a Knee Exoskeleton : Design and Modeling. In: Springer, editor. *Advances in Reconfigurable Mechanisms and Robots I*. London (UK); 2012. p. 411–21. doi:10.1007/978-1-4471-4141-9.
- [2] Karavas NC, Tsagarakis NG, Caldwell DG. Design, Modeling and Control of a Series Elastic Actuator for an Assistive Knee Exoskeleton. In: 4th IEEE RAS/EMBS International Conference on Biomedical Robotics and Biomechatronics (BioRob). Roma (Italy); 2012. p. 1813–9. doi:10.1109/BioRob.2012.6290757.



## Actuators

|                                          |                          |
|------------------------------------------|--------------------------|
| Type                                     | Pneumatic actuator – PAM |
| Location                                 | On-board/off-board       |
| Power                                    | N/A                      |
| Maximum torque                           | N/A                      |
| Maximum speed                            | N/A                      |
| Bandwidth                                | N/A                      |
| Weight                                   | N/A                      |
| Modular actuators                        | ✘                        |
| <i>Actuator specific characteristics</i> |                          |
| Pneumatic muscles/leg                    | 4                        |
| Artificial muscle diameter/length        | N/A / N/A                |
| Artificial muscle maximum pressure       | N/A                      |
| Artificial muscle stiffness              | N/A                      |
| Actuator stiffness                       | N/A                      |

## Structure & interface attachment components

|                                 |                                                                     |
|---------------------------------|---------------------------------------------------------------------|
| Allowable wearer maximum weight | N/A                                                                 |
| Allowable wearer height range   | N/A                                                                 |
| Anthropomorphic considerations  | Measurements of the Mexican population [*]                          |
| Configurable dimensions         | · Pelvic width: 387.5 – 477.5 mm<br>· Leg length: 925.6 – 1105.6 mm |
| Structure typology              | Rigid structure                                                     |
| Braces/segment                  | N/A                                                                 |

## Applicability & general characteristics

|                      |                                                                  |
|----------------------|------------------------------------------------------------------|
| Target user          | Adults                                                           |
| Application          | Assistance/Rehabilitation (PA)                                   |
| Unilateral/bilateral | Bilateral                                                        |
| Set up               | Ambulatory                                                       |
| Exoskeleton weight   | N/A                                                              |
| Total DoFs           | 7 (Hip_AA, Hip_EE, Hip_FE, Knee_AA, Knee_FE, Ankle_PS, Ankle_DP) |
| Actuated DoFs        | 2 (Hip_FE, Knee_FE)                                              |
| Walking speed        | N/A                                                              |

## Control

|                    |                                                       |
|--------------------|-------------------------------------------------------|
| Control strategies | · PD control<br>· PID control<br>· Admittance control |
|--------------------|-------------------------------------------------------|

## Electric power supply

|                  |     |
|------------------|-----|
| Battery autonomy | N/A |
|------------------|-----|

## Air source

|                  |                    |
|------------------|--------------------|
| Location         | On-board/Off-board |
| Autonomy         | N/A                |
| Maximum pressure | N/A                |

## Related publications

---

- [1] Aguilar-Sierra H, Yu W, Salazar S, Lopez R. Design and control of hybrid actuation lower limb exoskeleton. *Adv Mech Eng.* 2015;7:1–13. doi:10.1177/1687814015590988.
- [2] Aguilar-Sierra H, Lopez R, Yu W, Salazar S, Lozano R. A lower limb exoskeleton with hybrid actuation. In: 5th IEEE RAS & EMBS International Conference on Biomedical Robotics and Biomechatronics (BioRob). Sao Paulo (Brazil); 2014. p. 695–700. doi:10.1109/BIOROB.2014.6913859.
- [\*] Prado León LR, González Muñoz EL, and Avila Chaurand R, Dimensiones antropométricas de población latinoamericana. Universidad de Guadalajara, 2012.
-

**Actuators**

|                                          |                          |
|------------------------------------------|--------------------------|
| Type                                     | Pneumatic actuator – PAM |
| Location                                 | On-board                 |
| Power                                    | N/A                      |
| Maximum torque                           | N/A                      |
| Maximum speed                            | N/A                      |
| Bandwidth                                | N/A                      |
| Weight                                   | N/A                      |
| Modular actuators                        | ✘                        |
| <i>Actuator specific characteristics</i> |                          |
| Pneumatic muscles/leg                    | 8                        |
| Artificial muscle diameter/length        | 30 mm / 350-600 mm       |
| Artificial muscle maximum pressure       | 370 kPa                  |
| Artificial muscle stiffness              | 395N/m, 590N/m, 730N/m   |
| Actuator stiffness                       | N/A                      |

**Structure & interface attachment components**

|                                 |                                                                    |
|---------------------------------|--------------------------------------------------------------------|
| Allowable wearer maximum weight | N/A                                                                |
| Allowable wearer height range   | N/A                                                                |
| Anthropomorphic considerations  | NASA 'typical average adult' dimension considerations              |
| Configurable dimensions         | · Leg length (+/- 80 mm)<br>· Custom molded to each subject braces |
| Structure typology              | Rigid structure                                                    |
| Braces/segment                  | Combined solution (1 thigh, 2 shank)                               |

**Applicability & general characteristics**

|                      |                                               |
|----------------------|-----------------------------------------------|
| Target user          | Adults                                        |
| Application          | Rehabilitation (SCI/stroke)                   |
| Unilateral/bilateral | Bilateral                                     |
| Set up               | Treadmill-based (support structure)           |
| Exoskeleton weight   | 11 kg                                         |
| Total DoFs           | 5 (Hip_AA, Hip_EE, Hip_FE, Knee_FE, Ankle_DP) |
| Actuated DoFs        | 4 (Hip_AA, Hip_FE, Knee_FE, Ankle_DP)         |
| Walking speed        | N/A                                           |

**Control**

|                    |               |
|--------------------|---------------|
| Control strategies | · PID control |
|--------------------|---------------|

**Electric power supply**

|                  |     |
|------------------|-----|
| Battery autonomy | N/A |
|------------------|-----|

**Air source**

|                  |           |
|------------------|-----------|
| Location         | Off-board |
| Autonomy         | N/A       |
| Maximum pressure | N/A       |

## Related publications

- 
- [1] Costa N, Caldwell DG. Control of a biomimetic “soft-actuated” 10DoF lower body exoskeleton. In: 1st IEEE/RAS-EMBS International Conference on Biomedical Robotics and Biomechatronics (BioRob). Pisa (Italy); 2006. p. 495–501. doi:10.1109/BIOROB.2006.1639137.
- [2] Costa N, Bezdicek M, Brown M, Gray JO, Caldwell DG, Hutchins S. Joint motion control of a powered lower limb orthosis for rehabilitation. *Int J Autom Comput.* 2006;3:271–81. doi:10.1007/s11633-006-0271-x.
-

**Actuators**

|                                          |                                                 |
|------------------------------------------|-------------------------------------------------|
| Type                                     | Pneumatic actuator – McKibben artificial muscle |
| Location                                 | On-board                                        |
| Power                                    | N/A                                             |
| Maximum torque                           | N/A                                             |
| Maximum speed                            | N/A                                             |
| Bandwidth                                | N/A                                             |
| Weight                                   | N/A                                             |
| Modular actuators                        | ✘                                               |
| <i>Actuator specific characteristics</i> |                                                 |
| Pneumatic muscles per leg                | 8                                               |
| Artificial muscle diameter/length        | N/A / 200 mm                                    |
| Artificial muscle maximum pressure       | 400 kPa                                         |
| Artificial muscle stiffness              | N/A                                             |
| Actuator stiffness                       | N/A                                             |

**Structure & interface attachment components**

|                                 |                                                                               |
|---------------------------------|-------------------------------------------------------------------------------|
| Allowable wearer maximum weight | 79 kg                                                                         |
| Allowable wearer height range   | 175 cm                                                                        |
| Anthropomorphic considerations  | Requirements for the system were determined from the 50th percentile male [*] |
| Configurable dimensions         | N/A                                                                           |
| Structure typology              | Non-rigid structure (soft exoskeleton)                                        |
| Structure weight                | N/A                                                                           |
| Braces/segment                  | Multiple                                                                      |

**Applicability & general characteristics**

|                      |                                               |
|----------------------|-----------------------------------------------|
| Target user          | Adults                                        |
| Application          | Rehabilitation (SCI/stroke)/ PA               |
| Unilateral/bilateral | Bilateral                                     |
| Set up               | Ambulatory                                    |
| Exoskeleton weight   | 9.12 kg                                       |
| Total DoFs           | 5 (Hip_AA, Hip_EE, Hip_FE, Knee_FE, Ankle_DP) |
| Actuated DoFs        | 2 (Hip_FE, Knee_FE)                           |
| Walking speed        | N/A                                           |

**Control**

|                    |                      |
|--------------------|----------------------|
| Control strategies | Timing based control |
|--------------------|----------------------|

**Electric power supply**

|                  |     |
|------------------|-----|
| Battery autonomy | N/A |
|------------------|-----|

**Air source**

|                  |           |
|------------------|-----------|
| Location         | On-board  |
| Autonomy         | 1.45 min  |
| Maximum pressure | 30600 kPa |

## Related publications

---

[1] Wehner M, Quinlivan B, Aubin PM, Martinez-Villalpando E, Baumann M, Stirling L, et al. A lightweight soft exosuit for gait assistance. In: 2013 IEEE International Conference on Robotics and Automation (ICRA). 2013. p. 3362–9. doi:10.1109/ICRA.2013.6631046.

[\*] Hallemans A, De Clercq D, Otten B, Aerts P. 3D joint dynamics of walking in toddlers. A cross-sectional study spanning the first rapid development phase of walking. *Gait & Posture* 2005, 22:107-118.

---

**Actuators**

|                                          |                                                 |
|------------------------------------------|-------------------------------------------------|
| Type                                     | Pneumatic actuator – McKibben artificial muscle |
| Location                                 | On-board                                        |
| Power                                    | N/A                                             |
| Maximum torque                           | N/A                                             |
| Maximum speed                            | N/A                                             |
| Bandwidth                                | N/A                                             |
| Weight                                   | N/A                                             |
| Modular actuators                        | ✘                                               |
| <i>Actuator specific characteristics</i> |                                                 |
| Pneumatic muscles/leg                    | 6                                               |
| Artificial muscle diameter/length        | 25.40 mm / 400, 550, 650 mm                     |
| Artificial muscle maximum pressure       | 100, 200, 300, 350 kPa                          |
| Artificial muscle stiffness              | N/A                                             |
| Actuator stiffness                       | N/A                                             |

**Structure & interface attachment components**

|                                 |                                                                  |
|---------------------------------|------------------------------------------------------------------|
| Allowable wearer maximum weight | N/A                                                              |
| Allowable wearer height range   | N/A                                                              |
| Anthropomorphic considerations  | N/A                                                              |
| Configurable dimensions         | · Hip axis-knee axis distance<br>· Knee axis-ankle axis distance |
| Structure typology              | Rigid structure                                                  |
| Braces/segment                  | Combined solution (1 thigh, 2 shank)                             |

**Applicability & general characteristics**

|                      |                                       |
|----------------------|---------------------------------------|
| Target user          | Adults                                |
| Application          | Rehabilitation (SCI/stroke)           |
| Unilateral/bilateral | Bilateral                             |
| Set up               | Treadmill-based (body-weight support) |
| Exoskeleton weight   | N/A                                   |
| Total DoFs           | 2 (Hip_FE, Knee_FE)                   |
| Actuated DoFs        | 2 (Hip_FE, Knee_FE)                   |
| Walking speed        | 0.70 m/s                              |

**Control**

|                    |                                                                      |
|--------------------|----------------------------------------------------------------------|
| Control strategies | · Torque control<br>· Position control<br>· Assist-as-needed control |
|--------------------|----------------------------------------------------------------------|

**Electric power supply**

|                  |     |
|------------------|-----|
| Battery autonomy | N/A |
|------------------|-----|

**Air source**

|                  |           |
|------------------|-----------|
| Location         | Off-board |
| Autonomy         | N/A       |
| Maximum pressure | 5000 kPa  |

## Related publications

---

- [1] Dao Q. Design and Evaluation of the Lower-limb Robotic Orthosis for Gait Rehabilitation Actuated by Pneumatic Artificial Muscle. In: 2nd International Conference on Biomedical Signal and Image Processing. 2017. p. 85–9. doi:10.1145/3133793.3133810.
  - [2] Dao QT, Yamamoto SI. Assist-as-Needed Control of a Robotic Orthosis Actuated by Pneumatic Artificial Muscle for Gait Rehabilitation. Appl Sci. 2018;8. doi:10.1007/978-981-10-9038-7\_117.
  - [3] Mat Dzhahir MA, Nobutomo T, Yamamoto SI. Development of body weight support gait training system using pneumatic mckibben actuators -Control of Lower Extremity Orthosis-\*. In: 35th Annual International Conference of the IEEE EMBS. Osaka (Japan); 2013. p. 6417–20. doi:10.1109/EMBC.2013.6611023.
  - [4] Yamamoto SI, Shibata Y, Imai S, Nobutomo T, Miyoshi T. Development of gait training system powered by pneumatic actuator like human musculoskeletal system. In: 2011 IEEE International Conference on Rehabilitation Robotics (ICORR). Zurich (Switzerland); 2011. p. 8–11. doi:10.1109/ICORR.2011.5975452.
-



### Actuators

|                                          |                |
|------------------------------------------|----------------|
| Type                                     | Rigid actuator |
| Location                                 | On-board       |
| Power                                    | N/A            |
| Maximum torque                           | N/A            |
| Maximum speed                            | N/A            |
| Bandwidth                                | N/A            |
| Weight                                   | N/A            |
| Modular actuators                        | ✓              |
| <i>Actuator specific characteristics</i> |                |
| Extra spring/spring stiffness value      | ✗              |

### Structure & interface attachment components

|                                 |                                        |
|---------------------------------|----------------------------------------|
| Allowable wearer maximum weight | N/A                                    |
| Allowable wearer height range   | N/A                                    |
| Anthropomorphic considerations  | N/A                                    |
| Configurable dimensions         | N/A                                    |
| Structure typology              | Non-rigid structure (soft exoskeleton) |
| Structure weight                | N/A                                    |
| Braces/segment                  | Customfitted garment                   |

### Applicability & general characteristics

|                      |                                                |
|----------------------|------------------------------------------------|
| Target user          | Adults                                         |
| Application          | Assistance/rehabilitation (SCI/stroke/elderly) |
| Unilateral/bilateral | Bilateral                                      |
| Set up               | Ambulatory                                     |
| Exoskeleton weight   | N/A                                            |
| Total DoFs           | 3 (Hip_FE, Knee_FE, Ankle_DP)                  |
| Actuated DoFs        | 3 (Hip_FE, Knee_FE, Ankle_DP)                  |
| Walking speed        | N/A                                            |

### Control

|                    |                    |
|--------------------|--------------------|
| Control strategies | Biomimetic control |
|--------------------|--------------------|

### Electric power supply

|                  |     |
|------------------|-----|
| Battery autonomy | N/A |
|------------------|-----|

### Related publications

- [1] Graf ES, De Eyto A, Sposito M, Pauli C, O'Sullivan L, Bauer CM, et al. Basic functionality of a prototype wearable assistive soft exoskeleton for people with gait impairments - a case study. In: 11th ACM International Conference on Pervasive Technologies Related to Assistive Environments. 2018. p. 202–7. doi:10.1145/3197768.3197779.
- [2] Ortiz J, Natali C Di, Caldwell DG. XoSoft - Iterative Design of a Modular Soft Lower Limb Exoskeleton. In: Wearable robotics: challenges and trends; proceedings of the 4th International Symposium on Wearable Robotics (WeRob2018). Pisa (Italy); 2018. p. 351–5.

**Actuators**

|                                          |                    |
|------------------------------------------|--------------------|
| Type                                     | Rigid actuator     |
| Location                                 | On-board/off-board |
| Power                                    | N/A                |
| Maximum torque                           | N/A                |
| Maximum speed                            | 1.59 m/s           |
| Bandwidth                                | N/A                |
| Weight                                   | N/A                |
| Modular actuators                        | ✓                  |
| <i>Actuator specific characteristics</i> |                    |
| Extra spring/spring stiffness value      | ✓/ N/A             |

**Structure & interface attachment components**

|                                 |                                        |
|---------------------------------|----------------------------------------|
| Allowable wearer maximum weight | N/A                                    |
| Allowable wearer height range   | N/A                                    |
| Anthropomorphic considerations  | N/A                                    |
| Configurable dimensions         | N/A                                    |
| Structure typology              | Non-rigid structure (soft exoskeleton) |
| Structure weight                | N/A                                    |
| Braces/segment                  | 1                                      |

**Applicability & general characteristics**

|                      |                      |
|----------------------|----------------------|
| Target user          | Adults               |
| Application          | Assistance (PA)      |
| Unilateral/bilateral | Bilateral            |
| Set up               | Ambulatory           |
| Exoskeleton weight   | 6.60 kg              |
| Total DoFs           | 2 (Hip_FE, Ankle_PF) |
| Actuated DoFs        | 2 (Hip_FE, Ankle_PF) |
| Walking speed        | 1.79 m/s             |

**Control**

|                    |                              |
|--------------------|------------------------------|
| Control strategies | Force-based position control |
|--------------------|------------------------------|

**Electric power supply**

|                  |     |
|------------------|-----|
| Battery autonomy | N/A |
|------------------|-----|

**Related publications**

- [1] Asbeck AT, DeRossi SMM, Holt KG, Walsh CJ. A Biologically-Inspired Soft Exosuit for Walking Assistance. *Int J Rob Res.* 2015;34:744–62. doi:10.1177/0278364914562476.
- [2] Panizzolo FA, Galiana I, Asbeck AT, Sivi C, Schmidt K, Holt KG, et al. A biologically-inspired multi-joint soft exosuit that can reduce the energy cost of loaded walking. *J Neuroeng Rehabil.* 2016;13. doi:10.1186/s12984-016-0150-9.
- [3] Asbeck AT, Dyer RJ, Larusson AF, Walsh CJ. Biologically-inspired soft exosuit. In: 2013 IEEE International Conference on Rehabilitation Robotics (ICORR). Seattle (USA); 2013. p. 24–6. doi:10.1109/ICORR.2013.6650455.
- [4] Ding Y, Galiana I, Asbeck AT, De Rossi SMM, Bae J, Santos TRT, et al. Biomechanical and physiological evaluation of multi-joint assistance with soft exosuits. *IEEE Trans Neural Syst Rehabil Eng.* 2017;25:119–30. doi:10.1109/TNSRE.2016.2523250.
- [5] Asbeck AT, Schmidt K, Galiana I, Wagner D, Walsh CJ. Multi-joint Soft Exosuit for Gait Assistance. In: 2015 IEEE International Conference on Robotics and Automation (ICRA). Seattle (USA); 2015. p. 6197–204. doi:10.13140/RG.2.1.2874.5687.

## Actuators

|                                          |                |
|------------------------------------------|----------------|
| Type                                     | Rigid actuator |
| Location                                 | Off-board      |
| Power                                    | N/A            |
| Maximum torque                           | N/A            |
| Maximum speed                            | N/A            |
| Bandwidth                                | N/A            |
| Weight                                   | N/A            |
| Modular actuators                        | ✘              |
| <i>Actuator specific characteristics</i> |                |
| Extra spring/spring stiffness value      | ✘              |

## Structure & interface attachment components

|                                 |                                        |
|---------------------------------|----------------------------------------|
| Allowable wearer maximum weight | N/A                                    |
| Allowable wearer height range   | N/A                                    |
| Anthropomorphic considerations  | N/A                                    |
| Configurable dimensions         | N/A                                    |
| Structure typology              | Non-rigid structure (soft exoskeleton) |
| Structure weight                | 0.89 kg                                |
| Braces/segment                  | 1                                      |

## Applicability & general characteristics

|                      |                    |
|----------------------|--------------------|
| Target user          | Adults             |
| Application          | Assistance         |
| Unilateral/bilateral | Bilateral          |
| Set up               | Ambulatory         |
| Exoskeleton weight   | N/A                |
| Total DoFs           | 2 (Hip_F, Ankle_P) |
| Actuated DoFs        | 2 (Hip_F, Ankle_P) |
| Walking speed        | 1.50 m/s           |

## Control

|                    |                              |
|--------------------|------------------------------|
| Control strategies | Force-based position control |
|--------------------|------------------------------|

## Electric power supply

|                  |     |
|------------------|-----|
| Battery autonomy | N/A |
|------------------|-----|

## Related publications

[1] Quinlivan BT, Lee S, Malcolm P, Rossi DM, Grimmer M, Siviý C, et al. Assistance magnitude versus metabolic cost reductions for a tethered multiarticular soft exosuit. *Sci Robot.* 2017;2. doi:10.1126/scirobotics.aah4416.

**Actuators**

|                                          |                |
|------------------------------------------|----------------|
| Type                                     | Rigid actuator |
| Location                                 | Off-board      |
| Power                                    | N/A            |
| Maximum torque                           | N/A            |
| Maximum speed                            | 3.20 m/s       |
| Bandwidth                                | 19.60 Hz       |
| Weight                                   | N/A            |
| Modular actuators                        | ✘              |
| <i>Actuator specific characteristics</i> |                |
| Extra spring/spring stiffness value      | ✘              |

**Structure & interface attachment components**

|                                 |                                        |
|---------------------------------|----------------------------------------|
| Allowable wearer maximum weight | N/A                                    |
| Allowable wearer height range   | N/A                                    |
| Anthropomorphic considerations  | N/A.                                   |
| Configurable dimensions         | N/A                                    |
| Structure typology              | Non-rigid structure (soft exoskeleton) |
| Structure weight                | 0.86 kg                                |
| Braces/segment                  | 1                                      |

**Applicability & general characteristics**

|                      |            |
|----------------------|------------|
| Target user          | Adults     |
| Application          | Assistance |
| Unilateral/bilateral | Bilateral  |
| Set up               | Ambulatory |
| Exoskeleton weight   | N/A        |
| Total DoFs           | 1 (Hip_E)  |
| Actuated DoFs        | 1 (Hip_E)  |
| Walking speed        | 1.25 m/s   |

**Control**

|                    |                                                                                                                                        |
|--------------------|----------------------------------------------------------------------------------------------------------------------------------------|
| Control strategies | <ul style="list-style-type: none"> <li>· Admittance-force control</li> <li>· Admittance control</li> <li>· Position control</li> </ul> |
|--------------------|----------------------------------------------------------------------------------------------------------------------------------------|

**Electric power supply**

|                  |     |
|------------------|-----|
| Battery autonomy | N/A |
|------------------|-----|

**Related publications**

- [1] Ding Y, Kim M, Kuindersma S, Walsh CJ. Human-in-the-loop optimization of hip assistance with a soft exosuit during walking. *Sci Robot*. 2018;3. doi:10.1111/irfi.12020.
- [2] Lee G, Ding Y, Bujanda IG, Karavas N, Zhou YM, Walsh CJ. Improved assistive profile tracking of soft exosuits for walking and jogging with off-board actuation. In: 2017 IEEE/RSJ International Conference on Intelligent Robots and Systems (IROS). Vancouver (Canada); 2017. p. 1699–706. doi:10.1109/IROS.2017.8205981.
- [3] Ding Y, Panizzolo FA, Siviý C, Malcolm P, Galiana I, Holt KG, et al. Effect of timing of hip extension assistance during loaded walking with a soft exosuit. *J Neuroeng Rehabil*. 2016;13:87. doi:10.1186/s12984-016-0196-8.
- [4] Ding Y, Galiana I, Siviý C, Panizzolo FA, Walsh C. IMU-based iterative control for hip extension assistance with a soft exosuit. In: 2016 IEEE International Conference on Robotics and Automation (ICRA). Stockholm (Sweden); 2016. p. 3501–8. doi:10.1109/ICRA.2016.7487530.

**Actuators**

|                                          |                                          |
|------------------------------------------|------------------------------------------|
| Type                                     | SEA                                      |
| Location                                 | On-board                                 |
| Power                                    | N/A                                      |
| Maximum torque                           | 80 Nm                                    |
| Maximum speed                            | 5 rad/s                                  |
| Bandwidth                                | N/A                                      |
| Weight                                   | N/A                                      |
| Modular actuators                        | ✓                                        |
| <i>Actuator specific characteristics</i> |                                          |
| Spring typology                          | Custom made disc-shaped torsional spring |
| Spring stiffness                         | N/A                                      |
| Actuator stiffness                       | N/A                                      |

**Structure & interface attachment components**

|                                 |                                                                  |
|---------------------------------|------------------------------------------------------------------|
| Allowable wearer maximum weight | N/A                                                              |
| Allowable wearer height range   | N/A                                                              |
| Anthropomorphic considerations  | N/A                                                              |
| Configurable dimensions         | · Hip axis-knee axis distance<br>· Knee axis-ankle axis distance |
| Structure typology              | Rigid structure                                                  |
| Braces/segment                  | 2                                                                |

**Applicability & general characteristics**

|                      |                               |
|----------------------|-------------------------------|
| Target user          | Adults                        |
| Application          | Rehabilitation                |
| Unilateral/bilateral | Unilateral                    |
| Set up               | Ambulatory                    |
| Exoskeleton weight   | N/A                           |
| Total DoFs           | 3 (Hip_FE, Knee_FE, Ankle_DP) |
| Actuated DoFs        | 2 (Hip_FE, Knee_FE)           |
| Walking speed        | N/A                           |

**Control**

|                    |     |
|--------------------|-----|
| Control strategies | N/A |
|--------------------|-----|

**Electric power supply**

|                  |     |
|------------------|-----|
| Battery autonomy | N/A |
|------------------|-----|

**Related publications**

[1] Huang C, Chen W, Liu J, Zhang J. Design of a compliant joint actuator for lower-limb exoskeleton robot. In: 12th IEEE Conference on Industrial Electronics and Applications (ICIEA). 2017. p. 1522–7. doi:10.1109/ICIEA.2017.8283080.

**Actuators**

|                                          |                          |
|------------------------------------------|--------------------------|
| Type                                     | SEA                      |
| Location                                 | On-board                 |
| Power                                    | N/A                      |
| Maximum torque                           | 120 Nm                   |
| Maximum speed                            | 0.26 m/s                 |
| Bandwidth                                | 2600 N-5 Hz; 900 N-17 Hz |
| Weight                                   | 1.38 kg                  |
| Modular actuators                        | ✘                        |
| <i>Actuator specific characteristics</i> |                          |
| Spring typology                          | Linear spring            |
| Spring stiffness                         | 375-435 N/mm             |
| Actuator stiffness                       | N/A                      |

**Structure & interface attachment components**

|                                 |                 |
|---------------------------------|-----------------|
| Allowable wearer maximum weight | 75 kg           |
| Allowable wearer height range   | N/A             |
| Anthropomorphic considerations  | N/A             |
| Configurable dimensions         | N/A             |
| Structure typology              | Rigid structure |
| Braces/segment                  | 2               |

**Applicability & general characteristics**

|                      |                                 |
|----------------------|---------------------------------|
| Target user          | Adults                          |
| Application          | Rehabilitation/ PA              |
| Unilateral/bilateral | Unilateral                      |
| Set up               | Ambulatory                      |
| Exoskeleton weight   | 3.86 kg                         |
| Total DoFs           | 3 (Knee_FE, Ankle_DP, Ankle_PS) |
| Actuated DoFs        | 2 (Knee_FE, Ankle_DP)           |
| Walking speed        | N/A                             |

**Control**

|                    |               |
|--------------------|---------------|
| Control strategies | Force control |
|--------------------|---------------|

**Electric power supply**

|                  |     |
|------------------|-----|
| Battery autonomy | N/A |
|------------------|-----|

**Related publications**

[1] Beil J, Perner G, Asfour T. Design and Control of the Lower Limb Exoskeleton KIT-EXO-1. In: 2015 IEEE International Conference on Rehabilitation Robotics (ICORR). Singapore (Singapore); 2015. p. 119–24. doi:10.1109/ICORR.2015.7281186.

**Actuators**

|                                          |                             |
|------------------------------------------|-----------------------------|
| Type                                     | SEA                         |
| Location                                 | On-board                    |
| Power                                    | N/A                         |
| Maximum torque                           | N/A                         |
| Maximum speed                            | N/A                         |
| Bandwidth                                | N/A                         |
| Weight                                   | N/A                         |
| Modular actuators                        | ✘                           |
| <i>Actuator specific characteristics</i> |                             |
| Spring typology                          | Linear spring, Bowden cable |
| Spring stiffness                         | 17.97 N/mm                  |
| Actuator stiffness                       | N/A                         |

**Structure & interface attachment components**

|                                 |                                                                                                            |
|---------------------------------|------------------------------------------------------------------------------------------------------------|
| Allowable wearer maximum weight | 70 kg                                                                                                      |
| Allowable wearer height range   | N/A                                                                                                        |
| Anthropomorphic considerations  | “GB 10000-1988 Chinese adults body size” issued by the China National Standardization Management Committee |
| Configurable dimensions         | N/A                                                                                                        |
| Structure typology              | Rigid structure                                                                                            |
| Braces/segment                  | 1                                                                                                          |

**Applicability & general characteristics**

|                      |                                  |
|----------------------|----------------------------------|
| Target user          | Adults                           |
| Application          | Rehabilitation                   |
| Unilateral/bilateral | Unilateral                       |
| Set up               | Ambulatory                       |
| Exoskeleton weight   | N/A                              |
| Total DoFs           | 3 (Ankle_PS, Ankle_EE, Ankle_DP) |
| Actuated DoFs        | 1 (Ankle_DP)                     |
| Walking speed        | 1 m/s                            |

**Control**

|                    |     |
|--------------------|-----|
| Control strategies | N/A |
|--------------------|-----|

**Electric power supply**

|                  |     |
|------------------|-----|
| Battery autonomy | N/A |
|------------------|-----|

**Related publications**

[1] Zhang C, Zhu Y, Fan J, Zhao J, Yu H. Design of a quasi-passive 3 DOFs ankle-foot wearable rehabilitation orthosis. *Biomed Mater Eng.* 2015;26:S647–54. doi:10.3233/BME-151356.

## Actuators

|                                          |                                          |
|------------------------------------------|------------------------------------------|
| Type                                     | SEA (*=knee actuator, **=ankle actuator) |
| Location                                 | On-board                                 |
| Power                                    | N/A                                      |
| Maximum torque                           | N/A                                      |
| Maximum speed                            | N/A                                      |
| Bandwidth                                | N/A                                      |
| Weight                                   | N/A                                      |
| Modular actuators                        | ✘                                        |
| <i>Actuator specific characteristics</i> |                                          |
| Spring typology                          | Linear spring                            |
| Spring stiffness                         | 0.17 N/mm*, 0.18 N/mm**                  |
| Actuator stiffness                       | N/A                                      |

## Structure & interface attachment components

|                                 |                 |
|---------------------------------|-----------------|
| Allowable wearer maximum weight | 75 kg           |
| Allowable wearer height range   | N/A             |
| Anthropomorphic considerations  | N/A             |
| Configurable dimensions         | N/A             |
| Structure typology              | Rigid structure |
| Braces/segment                  | 1               |

## Applicability & general characteristics

|                      |                       |
|----------------------|-----------------------|
| Target user          | Adults                |
| Application          | Rehabilitation        |
| Unilateral/bilateral | Unilateral            |
| Set up               | Ambulatory            |
| Exoskeleton weight   | N/A                   |
| Total DoFs           | 2 (Knee_FE, Ankle_DP) |
| Actuated DoFs        | 2 (Knee_FE, Ankle_DP) |
| Walking speed        | N/A                   |

## Control

|                    |     |
|--------------------|-----|
| Control strategies | N/A |
|--------------------|-----|

## Electric power supply

|                  |     |
|------------------|-----|
| Battery autonomy | N/A |
|------------------|-----|

## Related publications

- [1] Lopez R, Aguilar-Sierra H, Salazar S, Lozano R. Model and Control of the ELLTIO with two degrees of freedom. In: 17th International Conference on System Theory, Control and Computing (ICSTCC). 2013. p. 305–10. doi:10.1109/ICSTCC.2013.6688977.
- [2] Lopez R, Salazar S, Torres J, Lozano R. Modeling and Control of a Lower Limb Exoskeleton with two degrees of freedom. In: 9th International Conference on Electrical Engineering, Computing Science and Automatic Control (CEE). Mexico City (Mexico); 2012. doi:10.1109/ICEEE.2012.6421205.



**Actuators**

|                                          |                                 |
|------------------------------------------|---------------------------------|
| Type                                     | SEA                             |
| Location                                 | On-board                        |
| Power                                    | 120 W (motor)                   |
| Maximum torque                           | 60 Nm                           |
| Maximum speed                            | N/A                             |
| Bandwidth                                | 16 Hz; 64 Hz                    |
| Weight                                   | 0.85 kg                         |
| Modular actuators                        | ✓                               |
| <i>Actuator specific characteristics</i> |                                 |
| Spring typology                          | Linear spring, torsional spring |
| Spring stiffness                         | 24 N/mm; 0.29 Nm/rad            |
| Actuator stiffness                       | N/A                             |

**Structure & interface attachment components**

|                                 |                 |
|---------------------------------|-----------------|
| Allowable wearer maximum weight | 70 kg           |
| Allowable wearer height range   | N/A             |
| Anthropomorphic considerations  | N/A             |
| Configurable dimensions         | N/A             |
| Structure typology              | Rigid structure |
| Braces/segment                  | 1               |

**Applicability & general characteristics**

|                      |                         |
|----------------------|-------------------------|
| Target user          | Adults                  |
| Application          | Rehabilitation (Stroke) |
| Unilateral/bilateral | Unilateral              |
| Set up               | Ambulatory              |
| Exoskeleton weight   | 3.50 kg                 |
| Total DoFs           | 2 (Knee_FE, Ankle_DP)   |
| Actuated DoFs        | 2 (Knee_FE, Ankle_DP)   |
| Walking speed        | N/A                     |

**Control**

|                    |                                                                                                                                         |
|--------------------|-----------------------------------------------------------------------------------------------------------------------------------------|
| Control strategies | <ul style="list-style-type: none"> <li>· Assistive force control</li> <li>· Force control</li> <li>· Human-in-charge control</li> </ul> |
|--------------------|-----------------------------------------------------------------------------------------------------------------------------------------|

**Electric power supply**

|                  |     |
|------------------|-----|
| Battery autonomy | N/A |
|------------------|-----|

**Related publications**

- [1] Yu H, Huang S, Chen G, Pan Y, Guo Z. Human – Robot Interaction Control of Rehabilitation Robots With Series Elastic Actuators. *IEEE Trans Robot.* 2015;31:1089–100. doi:10.1109/TRO.2015.2457314.
- [2] Mizanoor Rahman SM. Design of a Modular Knee-Ankle-Foot-Orthosis Using Soft Actuator for Gait Rehabilitation. In: 14th Annual Conference Towards Autonomous Robotic Systems. 2013. p. 195–209. doi:10.1007/978-3-662-43645-5.
- [3] Chen G, Yu H, Cruz MSTA, Chen G, Huang S, Zhu C, et al. Mechanical design of a portable knee-ankle-foot robot. In: 2013 IEEE International Conference on Robotics and Automation (ICRA). Karlsruhe (Germany); 2013. doi:10.1109/ICRA.2013.6630870.
- [4] Chen G, Qi P, Guo Z, Yu H. Mechanical design and evaluation of a compact portable knee – ankle – foot robot for gait rehabilitation. *Mech Mach Theory.* 2016;103:51–64. doi:10.1016/j.mechmachtheory.2016.04.012.

**Actuators**

|                                          |                  |
|------------------------------------------|------------------|
| Type                                     | SEA              |
| Location                                 | On-board         |
| Power                                    | N/A              |
| Maximum torque                           | 6 Nm             |
| Maximum speed                            | N/A              |
| Bandwidth                                | N/A              |
| Weight                                   | N/A              |
| Modular actuators                        | ✓                |
| <i>Actuator specific characteristics</i> |                  |
| Spring typology                          | Torsional spring |
| Spring stiffness                         | 3 Nm/rad         |
| Actuator stiffness                       | N/A              |

**Structure & interface attachment components**

|                                 |                                 |
|---------------------------------|---------------------------------|
| Allowable wearer maximum weight | 24.50 kg                        |
| Allowable wearer height range   | N/A                             |
| Anthropomorphic considerations  | N/A                             |
| Configurable dimensions         | The frame length is adjustable. |
| Structure typology              | Rigid structure                 |
| Braces/segment                  | 1                               |

**Applicability & general characteristics**

|                      |                       |
|----------------------|-----------------------|
| Target user          | Children              |
| Application          | Rehabilitation (CP)   |
| Unilateral/bilateral | Unilateral            |
| Set up               | Ambulatory            |
| Exoskeleton weight   | 2.50 kg               |
| Total DoFs           | 2 (Knee_FE, Ankle_DP) |
| Actuated DoFs        | 2 (Knee_FE, Ankle_DP) |
| Walking speed        | N/A                   |

**Control**

|                    |                                                |
|--------------------|------------------------------------------------|
| Control strategies | · Force control<br>· Spring deflection control |
|--------------------|------------------------------------------------|

**Electric power supply**

|                  |     |
|------------------|-----|
| Battery autonomy | N/A |
|------------------|-----|

**Related publications**

[1] Rossi S, Patanè F, Sette F Del, Cappa P. WAKE-up: a Wearable Ankle Knee Exoskeleton. In: 5th IEEE RAS & EMBS International Conference on Biomedical Robotics and Biomechatronics (BioRob). Sao Paulo (Brazil); 2014. p. 504–7. doi:10.1109/BIOROB.2014.6913827.

## Actuators

|                                          |                             |
|------------------------------------------|-----------------------------|
| Type                                     | SEA                         |
| Location                                 | On-board                    |
| Power                                    | N/A                         |
| Maximum torque                           | 780 Nm                      |
| Maximum speed                            | 6.81 rad/s                  |
| Bandwidth                                | N/A                         |
| Weight                                   | N/A                         |
| Modular actuators                        | -                           |
| <i>Actuator specific characteristics</i> |                             |
| Spring typology                          | Linear spring, Bowden cable |
| Spring stiffness                         | 10 N/mm                     |
| Actuator stiffness                       | 26 Nm/rad                   |

## Structure & interface attachment components

|                                 |                 |
|---------------------------------|-----------------|
| Allowable wearer maximum weight | N/A             |
| Allowable wearer height range   | N/A             |
| Anthropomorphic considerations  | N/A             |
| Configurable dimensions         | N/A             |
| Structure typology              | Rigid structure |
| Braces/segment                  | 1               |

## Applicability & general characteristics

|                      |                         |
|----------------------|-------------------------|
| Target user          | Adults                  |
| Application          | Rehabilitation (stroke) |
| Unilateral/bilateral | Unilateral              |
| Set up               | Ambulatory              |
| Exoskeleton weight   | N/A                     |
| Total DoFs           | 1 (Knee_FE)             |
| Actuated DoFs        | 1 (Knee_FE)             |
| Walking speed        | N/A                     |

## Control

|                    |               |
|--------------------|---------------|
| Control strategies | Force control |
|--------------------|---------------|

## Electric power supply

|                  |     |
|------------------|-----|
| Battery autonomy | N/A |
|------------------|-----|

## Related publications

[1] Celebi B, Yalcin M, Patoglu V. ASSISTON-KNEE: A Self-Aligning Knee Exoskeleton. In: 2013 IEEE/RSJ International Conference on Intelligent Robots and Systems (IROS). Tokyo (Japan); 2013. p. 996–1002. doi:10.1109/IROS.2013.6696472.

**Actuators**

|                                          |                                        |
|------------------------------------------|----------------------------------------|
| Type                                     | C-DSSAS (SEA)                          |
| Location                                 | On-board                               |
| Power                                    | N/A                                    |
| Maximum torque                           | N/A                                    |
| Maximum speed                            | N/A                                    |
| Bandwidth                                | N/A                                    |
| Weight                                   | N/A                                    |
| Modular actuators                        | -                                      |
| <i>Actuator specific characteristics</i> |                                        |
| Spring typology                          | Spiral spring                          |
| Spring stiffness                         | 6.60 Nm/rad, 8.25 Nm/rad, 11.02 Nm/rad |
| Actuator stiffness                       | N/A                                    |

**Structure & interface attachment components**

|                                 |                 |
|---------------------------------|-----------------|
| Allowable wearer maximum weight | N/A             |
| Allowable wearer height range   | N/A             |
| Anthropomorphic considerations  | N/A             |
| Configurable dimensions         | N/A             |
| Structure typology              | Rigid structure |
| Braces/segment                  | 2               |

**Applicability & general characteristics**

|                      |                |
|----------------------|----------------|
| Target user          | Adults         |
| Application          | Rehabilitation |
| Unilateral/bilateral | Unilateral     |
| Set up               | Ambulatory     |
| Exoskeleton weight   | N/A            |
| Total DoFs           | 1 (Knee_FE)    |
| Actuated DoFs        | 1 (Knee_FE)    |
| Walking speed        | N/A            |

**Control**

|                    |                |
|--------------------|----------------|
| Control strategies | Torque control |
|--------------------|----------------|

**Electric power supply**

|                  |     |
|------------------|-----|
| Battery autonomy | N/A |
|------------------|-----|

**Related publications**

[1] Choi W, Won J, Lee J, Park J. Low stiffness design and hysteresis compensation torque control of SEA for active exercise rehabilitation robots. *Auton Robots*. 2017;41:1221–42. doi:10.1007/s10514-016-9591-z.

## Actuators

|                                          |                                          |
|------------------------------------------|------------------------------------------|
| Type                                     | SEA                                      |
| Location                                 | On-board                                 |
| Power                                    | N/A                                      |
| Maximum torque                           | 15 Nm                                    |
| Maximum speed                            | 5.76 rad/s                               |
| Bandwidth                                | 5 Nm-9.6 Hz                              |
| Weight                                   | 2.53 kg                                  |
| Modular actuators                        | -                                        |
| <i>Actuator specific characteristics</i> |                                          |
| Spring typology                          | Custom made disc-shaped torsional spring |
| Spring stiffness                         | 200 Nm/rad                               |
| Actuator stiffness                       | N/A                                      |

## Structure & interface attachment components

|                                 |                 |
|---------------------------------|-----------------|
| Allowable wearer maximum weight | 70 kg           |
| Allowable wearer height range   | N/A             |
| Anthropomorphic considerations  | N/A             |
| Configurable dimensions         | N/A             |
| Structure typology              | Rigid structure |
| Braces/segment                  | N/A             |

## Applicability & general characteristics

|                      |                |
|----------------------|----------------|
| Target user          | Adults         |
| Application          | Rehabilitation |
| Unilateral/bilateral | Bilateral      |
| Set up               | Ambulatory     |
| Exoskeleton weight   | N/A            |
| Total DoFs           | 1 (Knee_FE)    |
| Actuated DoFs        | 1 (Knee_FE)    |
| Walking speed        | N/A            |

## Control

|                    |                                                                                                 |
|--------------------|-------------------------------------------------------------------------------------------------|
| Control strategies | <ul style="list-style-type: none"> <li>· Impedance control</li> <li>· Torque control</li> </ul> |
|--------------------|-------------------------------------------------------------------------------------------------|

## Electric power supply

|                  |     |
|------------------|-----|
| Battery autonomy | N/A |
|------------------|-----|

## Related publications

- [1] dos Santos WM, Caurin GAP, Siqueira AAG. Design and control of an active knee orthosis driven by a rotary Series Elastic Actuator. *Control Eng Pract.* 2017;58:307–18. doi:10.1016/j.conengprac.2015.09.008.
- [2] dos Santos WM, Siqueira AAG. Impedance Control of a Rotary Series Elastic Actuator for Knee Rehabilitation. In: 19th World Congress The International Federation of Automatic Control. Cape Town (South Africa): IFAC; 2014. p. 4801–6. doi:10.3182/20140824-6-ZA-1003.00987.
- [3] dos Santos WM, Caurin GAP, Siqueira AAG. Torque Control Characterization of a Rotary Series Elastic Actuator for Knee Rehabilitation. In: 16th International Conference on Advanced Robotics (ICAR). Montevideo (Uruguay); 2013. doi:10.1109/ICAR.2013.6766567.

## Actuators

|                                          |                             |
|------------------------------------------|-----------------------------|
| Type                                     | SEA                         |
| Location                                 | On-board                    |
| Power                                    | N/A                         |
| Maximum torque                           | N/A                         |
| Maximum speed                            | N/A                         |
| Bandwidth                                | N/A                         |
| Weight                                   | N/A                         |
| Modular actuators                        | -                           |
| <i>Actuator specific characteristics</i> |                             |
| Spring typology                          | Linear spring, Bowden cable |
| Spring stiffness                         | 32 N/mm                     |
| Actuator stiffness                       | N/A                         |

## Structure & interface attachment components

|                                 |                 |
|---------------------------------|-----------------|
| Allowable wearer maximum weight | N/A             |
| Allowable wearer height range   | N/A             |
| Anthropomorphic considerations  | N/A             |
| Configurable dimensions         | N/A             |
| Structure typology              | Rigid structure |
| Braces/segment                  | 1               |

## Applicability & general characteristics

|                      |                |
|----------------------|----------------|
| Target user          | Adults         |
| Application          | Rehabilitation |
| Unilateral/bilateral | Unilateral     |
| Set up               | Non-ambulatory |
| Exoskeleton weight   | N/A            |
| Total DoFs           | 1 (Knee_FE)    |
| Actuated DoFs        | 1 (Knee_FE)    |
| Walking speed        | N/A            |

## Control

|                    |     |
|--------------------|-----|
| Control strategies | N/A |
|--------------------|-----|

## Electric power supply

|                  |     |
|------------------|-----|
| Battery autonomy | N/A |
|------------------|-----|

## Related publications

[1] Ren Y, Member S, Zhang D, Member S. FEXO Knee : A Rehabilitation Device for Knee Joint Combining Functional Electrical Stimulation with a Compliant Exoskeleton. In: 5th IEEE RAS & EMBS International Conference on Biomedical Robotics and Biomechatronics (BioRob). Sao Paulo (Brazil); 2014. p. 683–8. doi:10.1109/BIOROB.2014.6913857.

**Actuators**

|                                          |                  |
|------------------------------------------|------------------|
| Type                                     | SEA              |
| Location                                 | On-board         |
| Power                                    | N/A              |
| Maximum torque                           | 140 Nm           |
| Maximum speed                            | N/A              |
| Bandwidth                                | N/A              |
| Weight                                   | N/A              |
| Modular actuators                        | -                |
| <i>Actuator specific characteristics</i> |                  |
| Spring typology                          | Torsional spring |
| Spring stiffness                         | N/A              |
| Actuator stiffness                       | 1000 Nm/rad      |

**Structure & interface attachment components**

|                                 |                                      |
|---------------------------------|--------------------------------------|
| Allowable wearer maximum weight | N/A                                  |
| Allowable wearer height range   | N/A                                  |
| Anthropomorphic considerations  | N/A                                  |
| Configurable dimensions         | N/A                                  |
| Structure typology              | Rigid structure                      |
| Braces/segment                  | Combined solution (2 thigh, 1 shank) |

**Applicability & general characteristics**

|                      |                                    |
|----------------------|------------------------------------|
| Target user          | Adults                             |
| Application          | Assistance/PA                      |
| Unilateral/bilateral | Unilateral                         |
| Set up               | Ambulatory                         |
| Exoskeleton weight   | 3.75 kg                            |
| Total DoFs           | 6 (Knee_FE, other knee joint DoFs) |
| Actuated DoFs        | 1 (Knee_FE)                        |
| Walking speed        | 1.37 m/s                           |

**Control**

|                    |                |
|--------------------|----------------|
| Control strategies | Torque control |
|--------------------|----------------|

**Electric power supply**

|                  |     |
|------------------|-----|
| Battery autonomy | N/A |
|------------------|-----|

**Related publications**

[1] Saccares L, Sarakoglou I, Tsagarakis NG. iT-Knee: An exoskeleton with ideal torque transmission interface for ergonomic power augmentation. In: 2016 IEEE/RSJ International Conference on Intelligent Robots and Systems (IROS). Daejeon (Korea); 2016. p. 780–6. doi:10.1109/IROS.2016.7759140.

**Actuators**

|                                          |                  |
|------------------------------------------|------------------|
| Type                                     | cRSEA            |
| Location                                 | On-board         |
| Power                                    | N/A              |
| Maximum torque                           | 130 Nm           |
| Maximum speed                            | N/A              |
| Bandwidth                                | 20 Hz            |
| Weight                                   | N/A              |
| Modular actuators                        | -                |
| <i>Actuator specific characteristics</i> |                  |
| Spring typology                          | Torsional spring |
| Spring stiffness                         | 0.30 Nm/rad      |
| Actuator stiffness                       | N/A              |

**Structure & interface attachment components**

|                                 |                 |
|---------------------------------|-----------------|
| Allowable wearer maximum weight | 70 kg           |
| Allowable wearer height range   | N/A             |
| Anthropomorphic considerations  | N/A             |
| Configurable dimensions         | N/A             |
| Structure typology              | Rigid structure |
| Braces/segment                  | 1               |

**Applicability & general characteristics**

|                      |             |
|----------------------|-------------|
| Target user          | Adults      |
| Application          | Assistance  |
| Unilateral/bilateral | Unilateral  |
| Set up               | Ambulatory  |
| Exoskeleton weight   | N/A         |
| Total DoFs           | 1 (Knee_FE) |
| Actuated DoFs        | 1 (Knee_FE) |
| Walking speed        | N/A         |

**Control**

|                    |                |
|--------------------|----------------|
| Control strategies | Torque control |
|--------------------|----------------|

**Electric power supply**

|                  |     |
|------------------|-----|
| Battery autonomy | N/A |
|------------------|-----|

**Related publications**

[1] Kong K, Bae J, Tomizuka M. A compact rotary series elastic actuator for human assistive systems. IEEE/ASME Trans Mechatronics. 2012;17:288–97. doi:10.1109/TMECH.2010.2100046.



**Actuators**

|                                          |               |
|------------------------------------------|---------------|
| Type                                     | SEA           |
| Location                                 | On-board      |
| Power                                    | N/A           |
| Maximum torque                           | 71 Nm         |
| Maximum speed                            | N/A           |
| Bandwidth                                | N/A           |
| Weight                                   | N/A           |
| Modular actuators                        | ✘             |
| <i>Actuator specific characteristics</i> |               |
| Spring typology                          | Linear spring |
| Spring stiffness                         | N/A           |
| Actuator stiffness                       | N/A           |

**Structure & interface attachment components**

|                                 |                              |
|---------------------------------|------------------------------|
| Allowable wearer maximum weight | N/A                          |
| Allowable wearer height range   | 155 – 180 cm                 |
| Anthropomorphic considerations  | N/A                          |
| Configurable dimensions         | Braces longitudinal position |
| Structure typology              | Rigid structure              |
| Braces/segment                  | 1                            |

**Applicability & general characteristics**

|                      |             |
|----------------------|-------------|
| Target user          | Adults      |
| Application          | Assistance  |
| Unilateral/bilateral | Unilateral  |
| Set up               | Ambulatory  |
| Exoskeleton weight   | N/A         |
| Total DoFs           | 1 (Knee_FE) |
| Actuated DoFs        | 1 (Knee_FE) |
| Walking speed        | N/A         |

**Control**

|                    |               |
|--------------------|---------------|
| Control strategies | Force control |
|--------------------|---------------|

**Electric power supply**

|                  |     |
|------------------|-----|
| Battery autonomy | N/A |
|------------------|-----|

**Related publications**

[1] Luo Y, Wang C, Wang Z, Ma Y, Wang C, Wu X. Design and control for a compliant knee exoskeleton. In: 2017 IEEE International Conference on Information and Automation (ICIA). Macau (China); 2017. p. 282–7. doi:10.1109/ICInfA.2017.8078920.

**Actuators**

|                                          |                  |
|------------------------------------------|------------------|
| Type                                     | SEA              |
| Location                                 | On-board         |
| Power                                    | 634 W (actuator) |
| Maximum torque                           | N/A              |
| Maximum speed                            | 0.28 rad/s       |
| Bandwidth                                | 7.5 Hz; 35 Hz    |
| Weight                                   | 1.13 kg          |
| Modular actuators                        | ✘                |
| <i>Actuator specific characteristics</i> |                  |
| Spring typology                          | Linear spring    |
| Spring stiffness                         | N/A              |
| Actuator stiffness                       | N/A              |

**Structure & interface attachment components**

|                                 |                 |
|---------------------------------|-----------------|
| Allowable wearer maximum weight | 60 kg           |
| Allowable wearer height range   | N/A             |
| Anthropomorphic considerations  | N/A.            |
| Configurable dimensions         | N/A             |
| Structure typology              | Rigid structure |
| Braces/segment                  | 1               |

**Applicability & general characteristics**

|                      |                 |
|----------------------|-----------------|
| Target user          | Adults          |
| Application          | Assistance (PA) |
| Unilateral/bilateral | Unilateral      |
| Set up               | Ambulatory      |
| Exoskeleton weight   | 3.00 kg         |
| Total DoFs           | 1 (Knee_FE)     |
| Actuated DoFs        | 1 (Knee_FE)     |
| Walking speed        | 2.50 m/s        |

**Control**

|                    |               |
|--------------------|---------------|
| Control strategies | Force control |
|--------------------|---------------|

**Electric power supply**

|                  |     |
|------------------|-----|
| Battery autonomy | N/A |
|------------------|-----|

**Related publications**

[1] Pratt JE, Krupp BT, Morse CJ, Collins SH. The RoboKnee: an exoskeleton for enhancing strength and endurance during walking. In: 2004 IEEE International Conference on Robotics and Automation (ICRA). New Orleans (USA); 2004. p. 2430–5. doi:10.1109/ROBOT.2004.1307425.

**Actuators**

|                                          |                                |
|------------------------------------------|--------------------------------|
| Type                                     | SEA                            |
| Location                                 | On-board                       |
| Power                                    | 634 W                          |
| Maximum torque                           | 41 Nm                          |
| Maximum speed                            | N/A                            |
| Bandwidth                                | 4 Hz; 8 Hz                     |
| Weight                                   | N/A                            |
| Modular actuators                        | ✘                              |
| <i>Actuator specific characteristics</i> |                                |
| Spring typology                          | Torsional spring, Bowden cable |
| Spring stiffness                         | 24 Nm/rad                      |
| Actuator stiffness                       | N/A                            |

**Structure & interface attachment components**

|                                 |                 |
|---------------------------------|-----------------|
| Allowable wearer maximum weight | N/A             |
| Allowable wearer height range   | N/A             |
| Anthropomorphic considerations  | N/A             |
| Configurable dimensions         | N/A             |
| Structure typology              | Rigid structure |
| Braces/segment                  | 1               |

**Applicability & general characteristics**

|                      |                                                 |
|----------------------|-------------------------------------------------|
| Target user          | Adults                                          |
| Application          | Assistance (Stroke)                             |
| Unilateral/bilateral | Unilateral                                      |
| Set up               | Treadmill-based (body-weight support structure) |
| Exoskeleton weight   | 1.20 kg                                         |
| Total DoFs           | 1 (Knee_FE)                                     |
| Actuated DoFs        | 1 (Knee_FE)                                     |
| Walking speed        | 1.10 m/s                                        |

**Control**

|                    |                |
|--------------------|----------------|
| Control strategies | Torque control |
|--------------------|----------------|

**Electric power supply**

|                  |     |
|------------------|-----|
| Battery autonomy | N/A |
|------------------|-----|

**Related publications**

[1] Sulzer JS, Roiz RA, Peshkin MA, Patton JL. A Highly Backdrivable, Lightweight Knee Actuator for Investigating Gait in Stroke. IEEE Trans Robot. 2009;25:539–48. doi:10.1109/TRO.2009.2019788.A.

## Actuators

|                                          |                             |
|------------------------------------------|-----------------------------|
| Type                                     | SEA                         |
| Location                                 | On-board                    |
| Power                                    | N/A                         |
| Maximum torque                           | N/A                         |
| Maximum speed                            | 1 m/s                       |
| Bandwidth                                | 16 Hz; 24 Hz                |
| Weight                                   | 0.95 kg                     |
| Modular actuators                        | ✓                           |
| <i>Actuator specific characteristics</i> |                             |
| Spring typology                          | Linear spring, Bowden cable |
| Spring stiffness                         | 10 N/mm                     |
| Actuator stiffness                       | N/A                         |

## Structure & interface attachment components

|                                 |                 |
|---------------------------------|-----------------|
| Allowable wearer maximum weight | N/A             |
| Allowable wearer height range   | N/A             |
| Anthropomorphic considerations  | N/A             |
| Configurable dimensions         | N/A             |
| Structure typology              | Rigid structure |
| Braces/segment                  | 1               |

## Applicability & general characteristics

|                      |                                  |
|----------------------|----------------------------------|
| Target user          | Adults                           |
| Application          | Rehabilitation (stroke)          |
| Unilateral/bilateral | Unilateral                       |
| Set up               | Ambulatory                       |
| Exoskeleton weight   | 4.25 kg                          |
| Total DoFs           | 3 (Ankle_DP, Ankle_EE, Ankle_PS) |
| Actuated DoFs        | 2 (Ankle_DP, Ankle_PS)           |
| Walking speed        | N/A                              |

## Control

|                    |                                                                                                     |
|--------------------|-----------------------------------------------------------------------------------------------------|
| Control strategies | <ul style="list-style-type: none"> <li>· Force control</li> <li>· Zero impedance control</li> </ul> |
|--------------------|-----------------------------------------------------------------------------------------------------|

## Electric power supply

|                  |     |
|------------------|-----|
| Battery autonomy | N/A |
|------------------|-----|

## Related publications

[1] Erdogan A, Celebi B, Satici AC, Patoglu V. Assist On-Ankle: a reconfigurable ankle exoskeleton with series-elastic actuation. *Auton Robots*. 2017;41:743–58. doi:10.1007/s10514-016-9551-7.

**Actuators**

|                                          |               |
|------------------------------------------|---------------|
| Type                                     | SEA           |
| Location                                 | On-board      |
| Power                                    | 77 W          |
| Maximum torque                           | N/A           |
| Maximum speed                            | N/A           |
| Bandwidth                                | N/A           |
| Weight                                   | 0.50 kg       |
| Modular actuators                        | -             |
| <i>Actuator specific characteristics</i> |               |
| Spring typology                          | Linear spring |
| Spring stiffness                         | N/A           |
| Actuator stiffness                       | N/A           |

**Structure & interface attachment components**

|                                 |                 |
|---------------------------------|-----------------|
| Allowable wearer maximum weight | 80 kg           |
| Allowable wearer height range   | N/A             |
| Anthropomorphic considerations  | N/A             |
| Configurable dimensions         | N/A             |
| Structure typology              | Rigid structure |
| Braces/segment                  | 1               |

**Applicability & general characteristics**

|                      |              |
|----------------------|--------------|
| Target user          | Adults       |
| Application          | Assistance   |
| Unilateral/bilateral | Unilateral   |
| Set up               | Ambulatory   |
| Exoskeleton weight   | 1.75 kg      |
| Total DoFs           | 1 (Ankle_DP) |
| Actuated DoFs        | 1 (Ankle_DP) |
| Walking speed        | 1.25 m/s     |

**Control**

|                    |                                                                                                                               |
|--------------------|-------------------------------------------------------------------------------------------------------------------------------|
| Control strategies | <ul style="list-style-type: none"> <li>· Position control</li> <li>· Stiffness control</li> <li>· Velocity control</li> </ul> |
|--------------------|-------------------------------------------------------------------------------------------------------------------------------|

**Electric power supply**

|                  |     |
|------------------|-----|
| Battery autonomy | N/A |
|------------------|-----|

**Related publications**

- [1] Boehler AW, Hollander KW, Sugar TG, Shin D. Design, Implementation and Test Results of a Robust Control Method for a Powered Ankle Foot Orthosis (AFO). In: 2008 IEEE International Conference on Robotics and Automation (ICRA). Pasadena (USA); 2008. p. 2025–30. doi:10.1109/ROBOT.2008.4543504.
- [2] Hollander KW, Ilg R, Sugar TG, Herring D. An Efficient Robotic Tendon for Gait Assistance. J Biomech Eng. 2006;128:788–91. doi:10.1115/1.2264391.
- [3] Hitt J, Oymagil AM, Sugar T, Hollander K, Boehler A, Fleeger J. Dynamically controlled ankle-foot orthosis (DCO) with regenerative kinetics: Incrementally attaining user portability. In: 2007 IEEE International Conference on Robotics and Automation (ICRA). Roma (Italy); 2007. p. 1541–6. doi:10.1109/ROBOT.2007.363543.

### Actuators

|                                          |               |
|------------------------------------------|---------------|
| Type                                     | SEA           |
| Location                                 | On-board      |
| Power                                    | N/A           |
| Maximum torque                           | N/A           |
| Maximum speed                            | N/A           |
| Bandwidth                                | N/A           |
| Weight                                   | N/A           |
| Modular actuators                        | -             |
| <i>Actuator specific characteristics</i> |               |
| Spring typology                          | Linear spring |
| Spring stiffness                         | 78.90 N/mm    |
| Actuator stiffness                       | N/A           |

### Structure & interface attachment components

|                                 |                                                             |
|---------------------------------|-------------------------------------------------------------|
| Allowable wearer maximum weight | N/A                                                         |
| Allowable wearer height range   | N/A                                                         |
| Anthropomorphic considerations  | Anthropometric measures of a healthy human were considered. |
| Configurable dimensions         | N/A                                                         |
| Structure typology              | Rigid structure                                             |
| Braces/segment                  | 1                                                           |

### Applicability & general characteristics

|                      |                |
|----------------------|----------------|
| Target user          | Adults         |
| Application          | Rehabilitation |
| Unilateral/bilateral | Unilateral     |
| Set up               | Ambulatory     |
| Exoskeleton weight   | N/A            |
| Total DoFs           | 1 (Ankle_DP)   |
| Actuated DoFs        | 1 (Ankle_DP)   |
| Walking speed        | N/A            |

### Control

|                    |                                                                                                                                      |
|--------------------|--------------------------------------------------------------------------------------------------------------------------------------|
| Control strategies | <ul style="list-style-type: none"> <li>· Force control</li> <li>· Impedance control</li> <li>· Variable impedance control</li> </ul> |
|--------------------|--------------------------------------------------------------------------------------------------------------------------------------|

### Electric power supply

|                  |     |
|------------------|-----|
| Battery autonomy | N/A |
|------------------|-----|

### Related publications

[1] Jardim B, Siqueira AAG. Development and analysis of series elastic actuators for impedance control of an active ankle-foot orthosis. J Brazilian Soc Mech Sci Eng. 2014;36:501–10. doi:10.1007/s40430-013-0092-0.

**Actuators**

|                                          |               |
|------------------------------------------|---------------|
| Type                                     | SEA           |
| Location                                 | On-board      |
| Power                                    | N/A           |
| Maximum torque                           | N/A           |
| Maximum speed                            | N/A           |
| Bandwidth                                | N/A           |
| Weight                                   | N/A           |
| Modular actuators                        | -             |
| <i>Actuator specific characteristics</i> |               |
| Spring typology                          | Linear spring |
| Spring stiffness                         | N/A           |
| Actuator stiffness                       | N/A           |

**Structure & interface attachment components**

|                                 |                 |
|---------------------------------|-----------------|
| Allowable wearer maximum weight | N/A             |
| Allowable wearer height range   | N/A             |
| Anthropomorphic considerations  | N/A             |
| Configurable dimensions         | N/A             |
| Structure typology              | Rigid structure |
| Braces/segment                  | 1               |

**Applicability & general characteristics**

|                      |                |
|----------------------|----------------|
| Target user          | Adults         |
| Application          | Rehabilitation |
| Unilateral/bilateral | Unilateral     |
| Set up               | Ambulatory     |
| Exoskeleton weight   | 2.60 kg        |
| Total DoFs           | 1 (Ankle_DP)   |
| Actuated DoFs        | 1 (Ankle_DP)   |
| Walking speed        | N/A            |

**Control**

|                    |                   |
|--------------------|-------------------|
| Control strategies | Impedance control |
|--------------------|-------------------|

**Electric power supply**

|                  |     |
|------------------|-----|
| Battery autonomy | N/A |
|------------------|-----|

**Related publications**

[1] Blaya JA, Herr H. Adaptive Control of a Variable-Impedance Ankle-Foot Orthosis to Assist Drop-Foot Gait. IEEE Trans Neural Syst Rehabil Eng. 2004;12:24–31. doi:10.1109/TNSRE.2003.823266.

**Actuators**

|                                          |                                                                                    |
|------------------------------------------|------------------------------------------------------------------------------------|
| Type                                     | SEA                                                                                |
| Location                                 | Off-board                                                                          |
| Power                                    | N/A                                                                                |
| Maximum torque                           | N/A                                                                                |
| Maximum speed                            | 5.30 rad/s                                                                         |
| Bandwidth                                | 17.70 Hz – 50 Nm; 24.20 Hz – 20 Nm                                                 |
| Weight                                   | N/A                                                                                |
| Modular actuators                        | ✘                                                                                  |
| <i>Actuator specific characteristics</i> |                                                                                    |
| Spring typology                          | Linear spring                                                                      |
| Spring stiffness                         | 15.10 N/mm, 27.50 N/mm, 50.10 N/mm, 103.10 N/mm, 235.7 N/mm                        |
| Actuator stiffness                       | 108.90 Nm/rad, 160.40 Nm/rad, 212 Nm/rad, 269.30 Nm/rad, 320.90 Nm/rad, 228 Nm/rad |

**Structure & interface attachment components**

|                                 |                                                                                                                        |
|---------------------------------|------------------------------------------------------------------------------------------------------------------------|
| Allowable wearer maximum weight | N/A                                                                                                                    |
| Allowable wearer height range   | N/A                                                                                                                    |
| Anthropomorphic considerations  | · User shank lengths ranging from 0.42 to 0.50 m<br>· Shoe sizes ranging from a women's size 7 to a men's size 12 (US) |
| Configurable dimensions         | Shank length: + 0.04 m                                                                                                 |
| Structure typology              | Rigid structure                                                                                                        |
| Braces/segment                  | 1                                                                                                                      |

**Applicability & general characteristics**

|                      |                           |
|----------------------|---------------------------|
| Target user          | Adults                    |
| Application          | Rehabilitation/assistance |
| Unilateral/bilateral | Unilateral                |
| Set up               | Ambulatory                |
| Exoskeleton weight   | 0.87 kg                   |
| Total DoFs           | 1 (Ankle_P)               |
| Actuated DoFs        | 1 (Ankle_P)               |
| Walking speed        | 1.25 m/s                  |

**Control**

|                    |                                            |
|--------------------|--------------------------------------------|
| Control strategies | · Proportional control<br>· Torque control |
|--------------------|--------------------------------------------|

**Electric power supply**

|                  |     |
|------------------|-----|
| Battery autonomy | N/A |
|------------------|-----|

**Related publications**

[1] Witte KA, Zhang J, Jackson RW, Collins SH. Design of two lightweight, high-bandwidth torque-controlled ankle exoskeletons. In: 2015 IEEE International Conference on Robotics and Automation (ICRA). Seattle (USA); 2015. p. 1223–8. doi:10.1109/ICRA.2015.7139347.



**Actuators**

|                                          |                                                 |
|------------------------------------------|-------------------------------------------------|
| Type                                     | Pneumatic actuator – McKibben artificial muscle |
| Location                                 | On-board                                        |
| Power                                    | N/A                                             |
| Maximum torque                           | N/A                                             |
| Maximum speed                            | N/A                                             |
| Bandwidth                                | N/A                                             |
| Weight                                   | N/A                                             |
| Modular actuators                        | ✓                                               |
| <i>Actuator specific characteristics</i> |                                                 |
| Pneumatic muscles per leg                | 4                                               |
| Artificial muscle diameter/length        | N/A / N/A                                       |
| Artificial muscle maximum pressure       | N/A                                             |
| Artificial muscle stiffness              | N/A                                             |
| Actuator stiffness                       | N/A                                             |

**Structure & interface attachment components**

|                                 |                                        |
|---------------------------------|----------------------------------------|
| Allowable wearer maximum weight | N/A                                    |
| Allowable wearer height range   | N/A                                    |
| Anthropomorphic considerations  | N/A                                    |
| Configurable dimensions         | N/A                                    |
| Structure typology              | Non-rigid structure (soft exoskeleton) |
| Structure weight                | N/A                                    |
| Braces/segment                  | 1                                      |

**Applicability & general characteristics**

|                      |                                          |
|----------------------|------------------------------------------|
| Target user          | Adults                                   |
| Application          | Assistance/Rehabilitation (Stroke/CP/MS) |
| Unilateral/bilateral | Unilateral                               |
| Set up               | Ambulatory                               |
| Exoskeleton weight   | 0.95 kg                                  |
| Total DoFs           | 2 (Ankle_PS, Ankle_DP)                   |
| Actuated DoFs        | 2 (Ankle_PS, Ankle_DP)                   |
| Walking speed        | N/A                                      |

**Control**

|                    |             |
|--------------------|-------------|
| Control strategies | PWM control |
|--------------------|-------------|

**Electric power supply**

|                  |         |
|------------------|---------|
| Battery autonomy | 2 hours |
|------------------|---------|

**Air source**

|                  |            |
|------------------|------------|
| Location         | Off-board  |
| Autonomy         | 320 cycles |
| Maximum pressure | 827 kPa    |

## Related publications

---

[1] Park Y, Chen B, Young D, Stirling L, Wood RJ, Goldfield E, et al. Bio-inspired Active Soft Orthotic Device for Ankle Foot Pathologies. In: 2011 IEEE/RSJ International Conference on Intelligent Robots and Systems (IROS). San Francisco (USA); 2011. p. 4488–95. doi:10.1109/IROS.2011.6048620.

[2] Park YL, Chen BR, Pérez-Arancibia NO, Young D, Stirling L, Wood RJ, et al. Design and control of a bio-inspired soft wearable robotic device for ankle-foot rehabilitation. *Bioinspir Biomim*. 2014;9:17. doi:10.1088/1748-3182/9/1/016007.

---

**Actuators**

|                                          |                                                 |
|------------------------------------------|-------------------------------------------------|
| Type                                     | Pneumatic actuator – McKibben artificial muscle |
| Location                                 | On-board                                        |
| Power                                    | N/A                                             |
| Maximum torque                           | N/A                                             |
| Maximum speed                            | N/A                                             |
| Bandwidth                                | 2.40 Hz                                         |
| Weight                                   | N/A                                             |
| Modular actuators                        | ✘                                               |
| <i>Actuator specific characteristics</i> |                                                 |
| Pneumatic muscles/leg                    |                                                 |
| Artificial muscle diameter/length        | N/A / N/A                                       |
| Artificial muscle maximum pressure       | N/A                                             |
| Artificial muscle stiffness              | N/A                                             |
| Actuator stiffness                       | N/A                                             |

**Structure & interface attachment components**

|                                 |                                                         |
|---------------------------------|---------------------------------------------------------|
| Allowable wearer maximum weight | N/A                                                     |
| Allowable wearer height range   | N/A                                                     |
| Anthropomorphic considerations  | Exoskeleton orthoses were custom molded to each subject |
| Configurable dimensions         | N/A                                                     |
| Structure typology              | Rigid structure                                         |
| Braces/segment                  | 1                                                       |

**Applicability & general characteristics**

|                      |                       |
|----------------------|-----------------------|
| Target user          | Adults                |
| Application          | Assistance            |
| Unilateral/bilateral | Unilateral            |
| Set up               | Ambulatory            |
| Exoskeleton weight   | N/A                   |
| Total DoFs           | 2 (Knee_FE, Ankle_DP) |
| Actuated DoFs        | 2 (Knee_FE, Ankle_DP) |
| Walking speed        | 1.25 m/s              |

**Control**

|                    |                                  |
|--------------------|----------------------------------|
| Control strategies | Proportional myoelectric control |
|--------------------|----------------------------------|

**Electric power supply**

|                  |     |
|------------------|-----|
| Battery autonomy | N/A |
|------------------|-----|

**Air source**

|                  |           |
|------------------|-----------|
| Location         | Off-board |
| Autonomy         | N/A       |
| Maximum pressure | N/A       |

## Related publications

---

[1] Sawicki GS, Ferris DP. A pneumatically powered knee-ankle-foot orthosis (KAFO) with myoelectric activation and inhibition. *J Neuroeng Rehabil.* 2009;6:1–16. doi:10.1186/1743-0003-6-23.

---

**Actuators**

|                                          |                           |
|------------------------------------------|---------------------------|
| Type                                     | Pneumatic actuator – PPAM |
| Location                                 | On-board                  |
| Power                                    | N/A                       |
| Maximum torque                           | N/A                       |
| Maximum speed                            | N/A                       |
| Bandwidth                                | 6 Hz-50 Nm; 20 Hz-10 Nm,  |
| Weight                                   | 0.15 kg                   |
| Modular actuators                        | ✘                         |
| <i>Actuator specific characteristics</i> |                           |
| Pneumatic muscles/leg                    | 2                         |
| Artificial muscle diameter/length        | N/A / N/A                 |
| Artificial muscle maximum pressure       | N/A                       |
| Artificial muscle stiffness              | N/A                       |
| Actuator stiffness                       | N/A                       |

**Structure & interface attachment components**

|                                 |                                 |
|---------------------------------|---------------------------------|
| Allowable wearer maximum weight | 90 kg                           |
| Allowable wearer height range   | N/A                             |
| Anthropomorphic considerations  | NASA's anthropometric data [*]  |
| Configurable dimensions         | Braces position and orientation |
| Structure typology              | Rigid structure                 |
| Braces/segment                  | 1                               |

**Applicability & general characteristics**

|                      |                                          |
|----------------------|------------------------------------------|
| Target user          | Adults                                   |
| Application          | Rehabilitation (MS)                      |
| Unilateral/bilateral | Unilateral                               |
| Set up               | Treadmill-based (supportive lateral arm) |
| Exoskeleton weight   | 4.50 kg                                  |
| Total DoFs           | 1 (Knee_FE)                              |
| Actuated DoFs        | 1 (Knee_FE)                              |
| Walking speed        | 0.70 m/s                                 |

**Control**

|                    |                                                                                                |
|--------------------|------------------------------------------------------------------------------------------------|
| Control strategies | <ul style="list-style-type: none"> <li>· Torque control</li> <li>· Position control</li> </ul> |
|--------------------|------------------------------------------------------------------------------------------------|

**Electric power supply**

|                  |     |
|------------------|-----|
| Battery autonomy | N/A |
|------------------|-----|

**Air source**

|                  |           |
|------------------|-----------|
| Location         | Off-board |
| Autonomy         | N/A       |
| Maximum pressure | N/A       |

## Related publications

---

[1] Beyl P, van Damme M, van Ham R, Vanderborgh B, Lefeber D. Design and control of a lower limb exoskeleton for robot-assisted gait training. *Appl Bionics Biomech*. 2009;6:229–43. doi:10.1080/11762320902784393.

[2] Beyl P, Van Damme M, Van Ham R, Vanderborgh B, Lefeber D. Pleated pneumatic artificial muscle-based actuator system as a torque source for compliant lower limb exoskeletons. *IEEE/ASME Trans Mechatronics*. 2014;19:1046–56. doi:10.1109/TMECH.2013.2268942.

[3] Beyl P, Knaepen K, Duerinck S, Van Damme M, Vanderborgh B, Meeusen R, et al. Safe and Compliant Guidance by a Powered Knee Exoskeleton for Robot-Assisted Rehabilitation of Gait. *Adv Robot*. 2011;25:513–35. doi:10.1163/016918611X558225.

[\*] NASA, 1978. Anthropometric source book, Vol. I: anthropometry for designers. NASA Scientific and Technical Information Office Hampton, VA, USA

---

## Actuators

|                                          |                                                 |
|------------------------------------------|-------------------------------------------------|
| Type                                     | Pneumatic actuator – McKibben artificial muscle |
| Location                                 | On-board                                        |
| Power                                    | N/A                                             |
| Maximum torque                           | N/A                                             |
| Maximum speed                            | N/A                                             |
| Bandwidth                                | 2.40 Hz                                         |
| Weight                                   | N/A                                             |
| Modular actuators                        | ✘                                               |
| <i>Actuator specific characteristics</i> |                                                 |
| Pneumatic muscles/leg                    | 2                                               |
| Artificial muscle diameter/length        | N/A / 460 mm                                    |
| Artificial muscle maximum pressure       | N/A                                             |
| Artificial muscle stiffness              | N/A                                             |
| Actuator stiffness                       | N/A                                             |

## Structure & interface attachment components

|                                 |                 |
|---------------------------------|-----------------|
| Allowable wearer maximum weight | N/A             |
| Allowable wearer height range   | N/A             |
| Anthropomorphic considerations  | N/A             |
| Configurable dimensions         | N/A             |
| Structure typology              | Rigid structure |
| Braces/segment                  | 1               |

## Applicability & general characteristics

|                      |                |
|----------------------|----------------|
| Target user          | Adults         |
| Application          | Rehabilitation |
| Unilateral/bilateral | Unilateral     |
| Set up               | Ambulatory     |
| Exoskeleton weight   | 1.21 kg        |
| Total DoFs           | 1 (Ankle_DP)   |
| Actuated DoFs        | 1 (Ankle_DP)   |
| Walking speed        | 1.25 m/s       |

## Control

|                    |                                  |
|--------------------|----------------------------------|
| Control strategies | Proportional myoelectric control |
|--------------------|----------------------------------|

## Electric power supply

|                  |     |
|------------------|-----|
| Battery autonomy | N/A |
|------------------|-----|

## Air source

|                  |           |
|------------------|-----------|
| Location         | Off-board |
| Autonomy         | N/A       |
| Maximum pressure | N/A       |

## Related publications

[1] Ferris DP, Gordon KE, Sawicki GS, Peethambaran A. An improved powered ankle-foot orthosis using proportional myoelectric control. *Gait Posture*. 2006;23:425–8. doi:10.1016/j.gaitpost.2005.05.004.

- [2] Gordon KE, Sawicki GS, Ferris DP. Mechanical performance of artificial pneumatic muscles to power an ankle-foot orthosis. *J Biomech.* 2006;39:1832–41. doi:10.1016/j.jbiomech.2005.05.018.
- [3] Sawicki GS, Ferris DP. Mechanics and energetics of level walking with powered ankle exoskeletons. *J Exp Biol.* 2008;211:1402–13. doi:10.1136/rmdopen-2015-000202.
-



**Actuators**

|                                          |                    |
|------------------------------------------|--------------------|
| Type                                     | Rigid actuator     |
| Location                                 | On-board/off-board |
| Power                                    | N/A                |
| Maximum torque                           | N/A                |
| Maximum speed                            | 1.50 m/s           |
| Bandwidth                                | N/A                |
| Weight                                   | 2.63 kg            |
| Modular actuators                        | ✘                  |
| <i>Actuator specific characteristics</i> |                    |
| Extra spring/spring stiffness value      | ✘                  |

**Structure & interface attachment components**

|                                 |                                        |
|---------------------------------|----------------------------------------|
| Allowable wearer maximum weight | N/A                                    |
| Allowable wearer height range   | N/A                                    |
| Anthropomorphic considerations  | Participant measures for frame fitting |
| Configurable dimensions         | N/A                                    |
| Structure typology              | Non-rigid frame (soft exoskeleton)     |
| Structure weight                | 0.90 kg                                |
| Braces/segment                  | 1                                      |

**Applicability & general characteristics**

|                      |                                             |
|----------------------|---------------------------------------------|
| Target user          | Adults                                      |
| Application          | Assistance (Stroke)                         |
| Unilateral/bilateral | Unilateral                                  |
| Set up               | Ambulatory/treadmill-based (safety harness) |
| Exoskeleton weight   | 4.09 kg                                     |
| Total DoFs           | 1 (Ankle_DP)                                |
| Actuated DoFs        | 1 (Ankle_DP)                                |
| Walking speed        | 1.25 m/s                                    |

**Control**

|                    |                  |
|--------------------|------------------|
| Control strategies | Position control |
|--------------------|------------------|

**Electric power supply**

|                  |     |
|------------------|-----|
| Battery autonomy | N/A |
|------------------|-----|

**Related publications**

[1] Awad LN, Bae J, O'Donnell K, De Rossi SMM, Hendron K, Sloop LH, et al. A soft robotic exosuit improves walking in patients after stroke. *Sci Transl Med.* 2017;9. doi:10.1126/scitranslmed.aai9084.

[2] Bae J, De Rossi SMM, O'Donnell K, Hendron KL, Awad LN, Teles Dos Santos TR, et al. A soft exosuit for patients with stroke: Feasibility study with a mobile off-board actuation unit. In: 2015 IEEE International Conference on Rehabilitation Robotics (ICORR). Singapore (Singapore); 2015. p. 131–8. doi:10.1109/ICORR.2015.7281188.

**Actuators**

|                                          |                |
|------------------------------------------|----------------|
| Type                                     | Rigid actuator |
| Location                                 | On-board       |
| Power                                    | 200 W (motor)  |
| Maximum torque                           | N/A            |
| Maximum speed                            | N/A            |
| Bandwidth                                | N/A            |
| Weight                                   | 0.749 kg       |
| Modular actuators                        | ✘              |
| <i>Actuator specific characteristics</i> |                |
| Extra spring/spring stiffness value      | ✘              |

**Structure & interface attachment components**

|                                 |                                               |
|---------------------------------|-----------------------------------------------|
| Allowable wearer maximum weight | N/A                                           |
| Allowable wearer height range   | N/A                                           |
| Anthropomorphic considerations  | Subjects with a foot size between 11 and 12.5 |
| Configurable dimensions         | N/A                                           |
| Structure typology              | Non-rigid structure (soft exoskeleton)        |
| Structure weight                | N/A                                           |
| Braces/segment                  | 2                                             |

**Applicability & general characteristics**

|                      |              |
|----------------------|--------------|
| Target user          | Adults       |
| Application          | Assistance   |
| Unilateral/bilateral | Bilateral    |
| Set up               | Ambulatory   |
| Exoskeleton weight   | 8.96 kg      |
| Total DoFs           | 1 (Ankle_DP) |
| Actuated DoFs        | 1 (Ankle_P)  |
| Walking speed        | 1.50 m/s     |

**Control**

|                    |                                                                                                   |
|--------------------|---------------------------------------------------------------------------------------------------|
| Control strategies | <ul style="list-style-type: none"> <li>· Torque control</li> <li>· Zero torque control</li> </ul> |
|--------------------|---------------------------------------------------------------------------------------------------|

**Electric power supply**

|                  |     |
|------------------|-----|
| Battery autonomy | N/A |
|------------------|-----|

**Related publications**

- [1] Mooney LM, Rouse EJ, Herr HM. Autonomous exoskeleton reduces metabolic cost of human walking during load carriage. *J Neuroeng Rehabil.* 2014;11:80. doi:10.1186/1743-0003-11-80.
- [2] Mooney LM, Herr HM. Biomechanical walking mechanisms underlying the metabolic reduction caused by an autonomous exoskeleton. *J Neuroeng Rehabil.* 2016;13:4. doi:10.1186/s12984-016-0111-3.
